# Supplementary material
Source: PubMed Central journal article supplement (PMC4707763)
Supplement: rspb20152417supp1.pdf [file rspb20152417supp1.pdf]

## APPENDIX A: EXPANDING CAPS TO MORE THAN TWO PROCESSES

In the model presented in the main article, both neutral and niche processes are represented by a single axis for simplification, corresponding to two community attributes: the dispersal limitation and the niche width, which are two parameters of the model. However, these processes may not be limited to a single parameter. For example, neutral models often consider constant immigration of individuals speciation into the community from a regional species pool to avoid monodominance of a single species [1-3]. This has been shown to influence the structure of the community [4, 5]. Implementing immigration (or speciation) plus dispersal limitation within the local community, as well as niche selection, means that three corresponding axes will be needed in CAPS (Figure A1). Any model with parameters lying on the niche axis is therefore a niche process, whereas any model with parameters lying on the plane defined by the dispersal and immigration (or speciation) axes is a neutral process (Figure A1). We therefore have a neutral plane instead of a neutral axis. Nonetheless, it is still possible to assess a composite process with respect to its neutral and niche components, like for the two-dimensional case, by using the distance from the neutral plane and the distance from the niche axis, respectively, and by comparing the values of the corresponding patterns (Figure A1). Similarly, niche axes such as distance between niche optima can also be added to the CAPS, and the measures of distance can simply be generalised to more complex dimensions.

Although beyond the scope of this paper, more processes (or additional complexity in the neutral and niche processes) and environmental configurations, can therefore be included as additional dimensions, to test not only if, but under which community and environmental attributes the continuum hypothesis is true or not. As shown by previous studies [4, 5], factors such as the immigration rate from a regional pool of species, the ratio between niche

26 separation and number of species, the spatial configuration of the environment (such as  
 27 environmental heterogeneity and distribution – or rather the ratio between dispersal limitation  
 28 and these factors), are particularly likely to be important to understand when the neutral-niche  
 29 continuum holds or not, because they affect how the environment can act as a dispersal  
 30 barrier, and therefore change the potential for mass-effect to occur. To this end, different  
 31 dispersal kernels would be important to consider, especially those with fat tails allowing for  
 32 long-range dispersal events. Adding other processes to CAPS, such as density dependence [6,  
 33 7], non-neutral dispersal kernels [8], variable niche optima [9], trade-off between dispersal  
 34 limitation and niche separation (corresponding to patch-dynamics, the last of the four meta-  
 35 community paradigms) [10], or  $R^*$  relative competitive ability [11], is likely to further  
 36 improve understanding of when the continuum holds and when it does not.

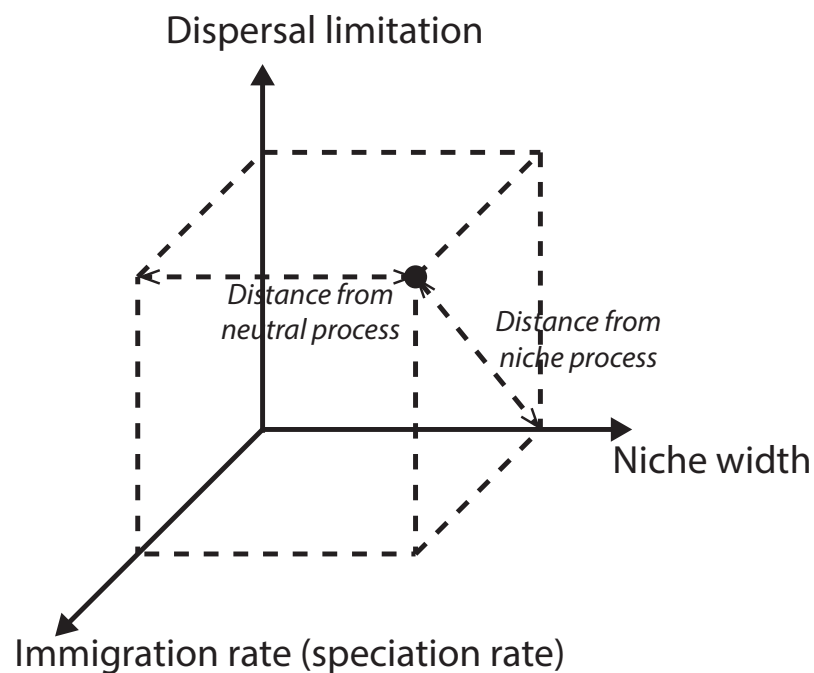

37  
 38 Figure A1. A three dimensional Community Assembly Phase Space. The neutral  
 39 plane, representing a neutral process, is defined by the dispersal limitation and the  
 40 immigration (or speciation) rate axes, whereas a niche process is represented by the  
 41 niche axis. Processes are characterised by their position in the space as shown by

42 the black circles, and the value of the patterns can be computed, as shown by the  
43 different diameters of the circles. A composite process can therefore be compared to  
44 the corresponding neutral and niche processes.

#### 45 REFERENCES

- 46
- 47 1. Chisholm R.A., Pacala S.W. 2010 Niche and neutral models predict asymptotically  
48 equivalent species abundance distributions in high-diversity ecological communities.  
49 *Proceedings of the National Academy of Sciences* **107**(36), 15821-15825.  
50 (doi:10.1073/pnas.1009387107).
- 51 2. Haegeman B., Loreau M. 2011 A mathematical synthesis of niche and neutral theories  
52 in community ecology. *J. Theor. Biol.* **269**(1), 150-165. (doi:10.1016/j.jtbi.2010.10.006).
- 53 3. Hubbell S.P. 2001 *The unified neutral theory of biodiversity and biogeography* (MPB-  
54 32), Princeton University Press.
- 55 4. Bar-Massada A., Kent R., Carmel Y. 2014 Environmental heterogeneity affects the  
56 location of modelled communities along the niche–neutrality continuum. *Proceedings of the*  
57 *Royal Society B: Biological Sciences* **281**(1783), 20133249. (doi:10.1098/rspb.2013.3249).
- 58 5. Gravel D., Canham C.D., Beaudet M., Messier C. 2006 Reconciling niche and  
59 neutrality: the continuum hypothesis. *Ecol. Lett.* **9**(4), 399-409. (doi:10.1111/j.1461-  
60 0248.2006.00884.x).
- 61 6. Armstrong R.A. 1989 Competition, seed predation, and species coexistence. *J. Theor.*  
62 *Biol.* **141**(2), 191-195. (doi:10.1016/S0022-5193(89)80017-7).
- 63 7. Chave J., Muller - Landau H.C., Levin S.A. 2002 Comparing classical community  
64 models: theoretical consequences for patterns of diversity. *The American Naturalist* **159**(1),  
65 1-23. (doi:10.1086/324112).
- 66 8. Lowe W.H., McPeck M.A. 2014 Is dispersal neutral? *Trends Ecol. Evol.* **29**(8), 444-  
67 450. (doi:10.1016/j.tree.2014.05.009).

- 68 9. Mutshinda C.M., O'Hara R.B. 2011 Integrating the niche and neutral perspectives on  
69 community structure and dynamics. *Oecologia* **166**(1), 241-251. (doi:10.1007/s00442-010-  
70 1831-x).
- 71 10. Logue J.B., Mouquet N., Peter H., Hillebrand H. 2011 Empirical approaches to  
72 metacommunities: a review and comparison with theory. *Trends Ecol. Evol.* **26**(9), 482-491.
- 73 11. Tilman D. 2004 Niche tradeoffs, neutrality, and community structure: a stochastic  
74 theory of resource competition, invasion, and community assembly. *Proceedings of the*  
75 *National Academy of Sciences of the United States of America* **101**(30), 10854-10861.  
76 (doi:10.1073/pnas.0403458101).

77

78 APPENDIX B: NEUTRAL, NICHE AND COMPOSITE MODEL IMPLEMENTATION  
 79 AND SIMULATION PARAMETERS

80 (a) Model Implementation

81 Neutral model:

82 The neutral model only accounts for the neutral filter. In the neutral model, each species  
 83 has a probability of reaching a cell, corresponding to the probability of at least one individual  
 84 of this species reaching the cell.

85 The probability of 1 individual  $i_l$  from species  $i$  reaching the cell is given by the following  
 86 dispersal function:

$$87 \quad {}^{ne}S_i(i_j) = \exp\left(\frac{\ln(0.01)}{d^2} r^2\right), \quad (B1)$$

88 where  $r$  is the distance from the source to the focal cell, and  $d$  the distance for which  
 89  ${}^{ne}S_i(i_j) = 0.01$  ( $d$  is the dispersal ability, i.e. the inverse of dispersal limitation). Given two  
 90 individuals  $i_j$  and  $i_k$  of species  $i$ , considering that the events of  $i_j$  and  $i_k$  reaching the cell are  
 91 independent of each other, the probability of at least one of them reaching the empty cell can  
 92 thus be calculated using the classic probability of the union:

$$93 \quad {}^{ne}S_i(i_j \cup i_k) = {}^{ne}S_i(i_j) + {}^{ne}S_i(i_k) - {}^{ne}S_i(i_j \cap i_k)$$

$$94 \quad {}^{ne}S_i(i_j) + {}^{ne}S_i(i_k) - {}^{ne}S_i(i_j) \times {}^{ne}S_i(i_k \vee i_j)$$

$$95 \quad {}^{ne}S_i(i_j) + {}^{ne}S_i(i_k) - {}^{ne}S_i(i_j) \times {}^{ne}S_i(i_k), \quad (B2)$$

96 By extension, given a third individual  $i_l$ :

$$97 \quad {}^{ne}S_i(i_j \cup i_k \cup i_l) = {}^{ne}S_i(i_j \cup i_k) + {}^{ne}S_i(i_l) - {}^{ne}S_i(i_j \cup i_k) \times {}^{ne}S_i(i_l), \quad (B3)$$

98 This is applied iteratively until all individuals from species  $i$  are considered. The result  
 99 is  ${}^{ne}S_i = {}^{ne}S_i(\cup i_j)$ , the probability of at least one individual  $i_j$  of species  $i$  reaching the focal  
 100 cell.

101 In practice, computing  ${}^{ne}S_i$  over all individuals is too computationally intensive. To  
 102 overcome this problem, we only applied the iterative process to the individuals closer than  $d$ ,  
 103 *i.e.* at the local scale. We therefore compute an approximation  ${}^{ne}S_i'$  of  ${}^{ne}S_i$ , corresponding to  
 104 the probability of an individual from the local community or from the regional community  
 105 reaching a cell, and based on Eqn B2:

$$106 \quad {}^{ne}S_i' = {}^{ne}S_i(\cup i_j \text{ for } r < d) + m \cdot \frac{n_i}{\sum_j n_j} - {}^{ne}S_i(\cup i_j \text{ for } r < d) \times m \cdot \frac{n_i}{\sum_j n_j} \quad (\text{B4})$$

107 where  $m$  is the proportion with which the regional community influences the neutral  
 108 process with respect to the local community, *i.e.* represents long distance dispersal, and  $n_i$  is  
 109 the abundance of species  $i$ . Since our purpose is to model Gaussian-like dispersal with no  
 110 long distance dispersal, we kept it low and used  $m=0.1$  in the simulations. The probability of  
 111 species  $i$  colonizing a cell in the neutral model therefore becomes:

$$112 \quad {}^{ne}R_i = \frac{{}^{ne}S_i'}{\sum_j {}^{ne}S_j'} \quad (\text{B5})$$

113 Niche model:

114 The niche model only accounts for the niche filter. In the niche model, we consider that  
 115 there is no dispersal limitation, and that any species can reach any cell. Each species then has  
 116 a survival probability  ${}^{ni}S_i$ , which equals to its fundamental niche  $\lambda_i(E)$  (Eqn B6) [1, 2], and the  
 117 probability of having species  $i$  colonizing a cell is given by Eqn B7.

$$118 \quad S_i = \lambda_i(E) = \exp\left(\frac{-(E-\mu_i)^2}{2\sigma^2}\right), \quad (\text{B6})$$

119 
$$R_i = \frac{s_i}{\sum_j s_j} \quad (\text{B7})$$

120 where  $\mu_i$  is the niche optimum of species  $i$ , and  $\sigma$  its niche width (equal for all species). For  
 121 infinite niche width, we have  $\lambda_i=1$  for all  $E$  values, i.e. complete niche overlap.

122 Composite model:

123 The composite model accounts for both filters, and therefore has to consider the  
 124 probability of a species reaching an empty cell, and surviving in this cell. Here, these two  
 125 probabilities are independent, so the joint probability can be simply computed as the product  
 126 of the two. We thus get:

127 
$${}^mS_i = {}^{ne}S_i' \times {}^{ni}S_i, \quad (\text{B8})$$

128 And the probability of species  $i$  colonizing a cell therefore becomes:

129 
$${}^mR_i = \frac{{}^{ne}S_i' \times s_i}{\sum_j {}^{ne}S_j' \times s_j} \quad (\text{B9})$$

130

131 Equivalence between species vs. between individuals:

132 Note that to allow for a smooth transition from the neutral-model to the species-sorting  
 133 paradigm in the two-dimensional CAPS considered here (Figures 1b, C1), we released the  
 134 strict assumption of equivalence between individuals as implemented by previous models [1,  
 135 2]: ( ${}^{ne}S_i = {}^{ne}S_i(i_1) + {}^{ne}S_i(i_2) + \dots + {}^{ne}S_i(i_n)$ ). This equation is  $<1$  and correspond to a  
 136 probability only if two different propagules cannot arrive in the focal cell, in which case  
 137  ${}^{ne}S_i(i_j \cap i_k) = 0$ . This is obviously not the case in our model, and this equation produces a  
 138 score rather than a probability. We assumed instead equivalence between species ( ${}^{ne}S_i =$

139  ${}^{ne}S_i(i_1 \cup i_2 \dots \cup i_n)$ ). Doing so ensures that for  $S$  species under infinite dispersal, each  
 140 species will have a probability  ${}^{ne}R_i=1/S$  of colonising any location in the neutral model, and  
 141 that the composite model then becomes equivalent to a niche model. Individuals from  
 142 different species are therefore not strictly equal, because there is a density-dependence effect,  
 143 but species remain equal [3]. By contrast, using the simple sum instead of equation B3 would  
 144 correspond to strict equivalence between individuals, but would make the composite process  
 145 sensitive to the relative abundance of the species for infinite dispersal rather than representing  
 146 pure species-sorting, as assumed by the niche process.

147 Equation B3 implies that as dispersal and the number of individuals of a species increase,  
 148  ${}^{ne}S_i$  will converge towards 1. In other words,  ${}^{ne}S_i$  will saturate as the abundance of a species  
 149 increases, and saturation will occur faster for wide dispersal kernels. We can compute an  
 150 estimate of the relationship between  ${}^{ne}S_i$ ,  $d$ ,  $r$  and the species abundance  $n_i$  by considering that  
 151 all individuals in a species are equidistant from the focal cell. In that case,  ${}^{ne}S_i(i_j) = {}^{ne}S_i(i_k) =$   
 152  $\exp(\ln(0.01) \times r^2/d^2)$  in Eqn B1, and we get the following equation.

$$153 \quad {}^{ne}S_i = \sum_{k=1}^n (-1)^{k-1} \times C_n^k {}^{ne}S_i (i_k)^k, \quad (\text{B10})$$

154 By contrast, using the simple sum [1,2] provides the score  ${}^{ne}S_i = n \times {}^{ne}S_i(i_j)$ . The outputs of  
 155 the two equations (Figures B1 and B2) shows that the saturation effect occurs when  
 156 individuals are close to the focal cell, but that using equation B3 gives a higher chance of  
 157 reaching the focal cell to species whose individuals are at intermediate distance than when  
 158 using the simple sum.



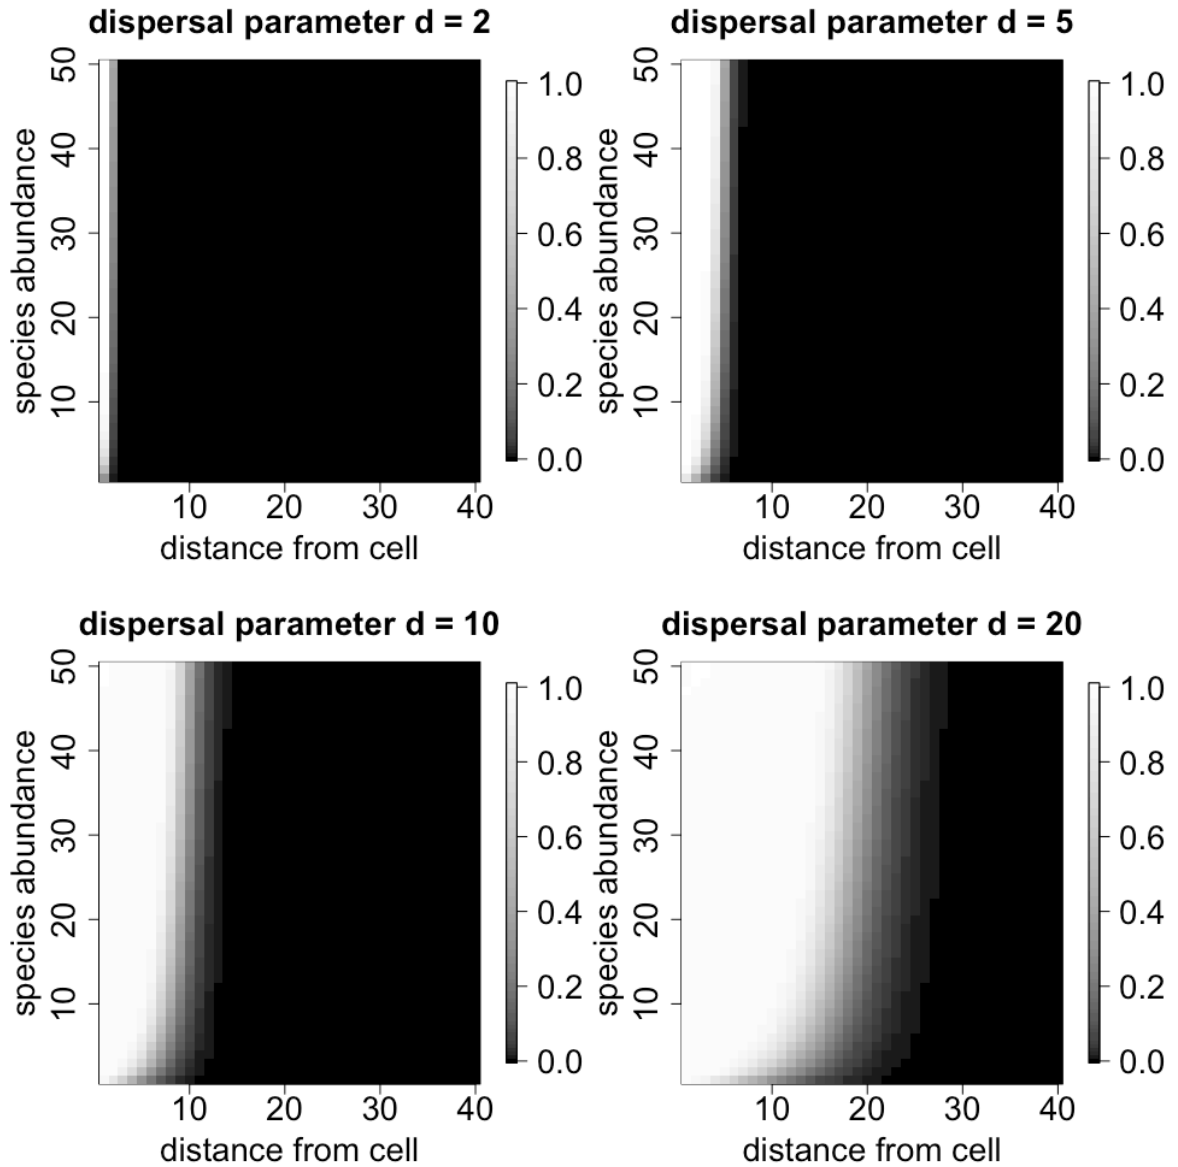

159

160 Figure B1. Probability of at least an individual of a particular species to arrive in a  
 161 focal cell with respect to the species abundance and the distance between the focal  
 162 cell and other individuals from the same species (assuming all individuals are at the  
 163 same distance), based on Eqn B3.

164

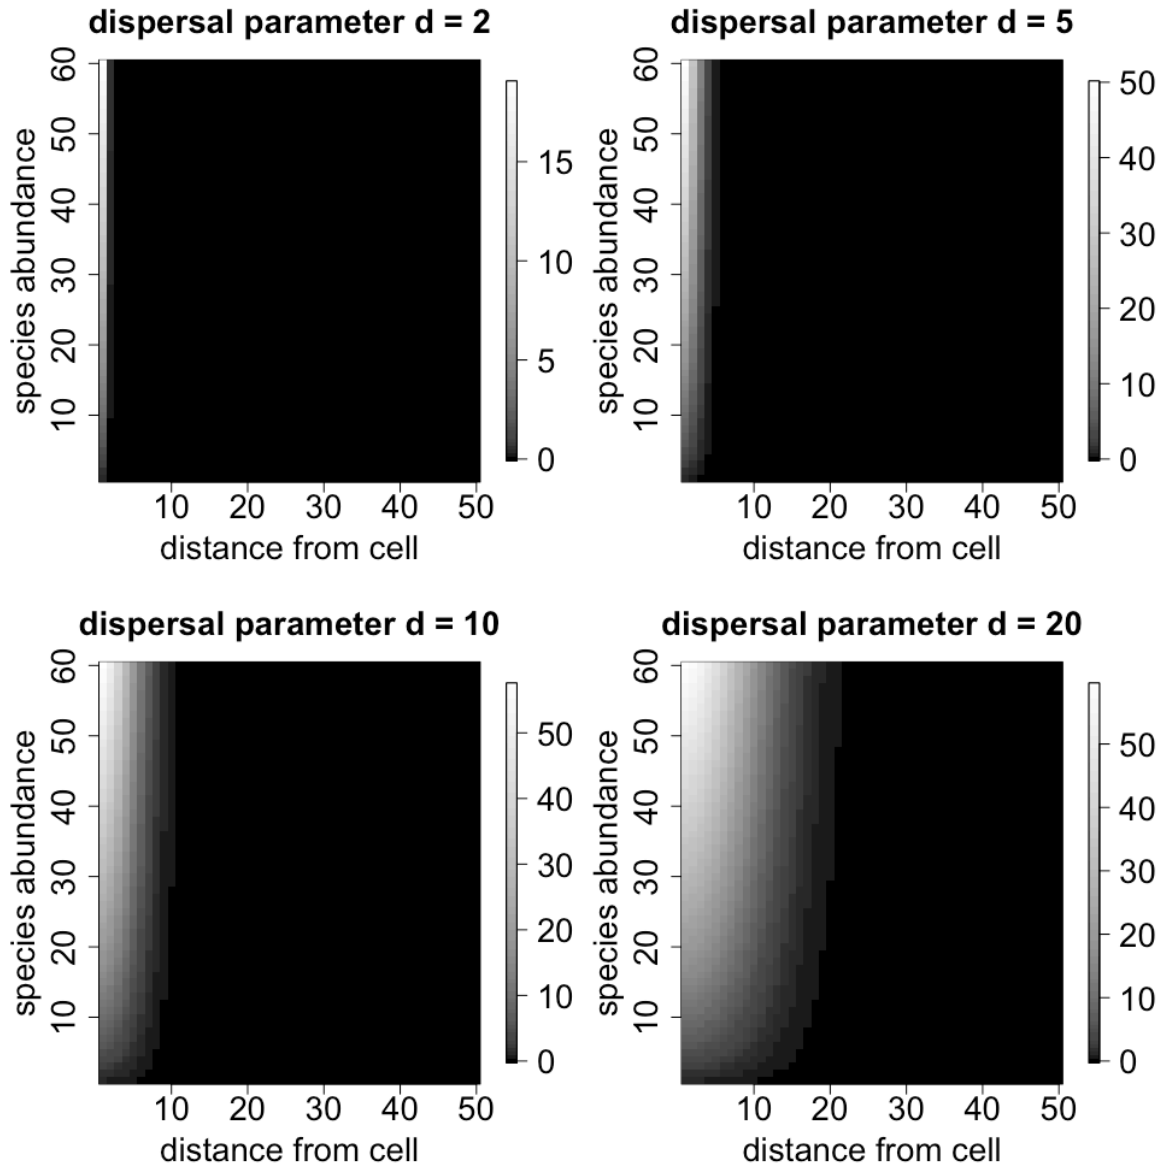

165

166 Figure B2. Score obtained by summing the probability of all individuals of a particular  
 167 species to arrive in a focal cell with respect to the species abundance and the  
 168 distance between the focal cell and other individuals from the same species  
 169 (assuming all individuals are at the same distance).

170 To control for the saturation effect, one should use  ${}^{ne}S_i(i_j \cup i_k) = {}^{ne}S_i(i_j) + {}^{ne}S_i(i_k) -$   
 171  $sat \times {}^{ne}S_i(i_j) \times {}^{ne}S_i(i_k)$  instead of equation B3, with  $0 \leq sat \leq 1$  as an extra axis (see  
 172 Appendix A). Note that  ${}^{ne}S_i$  is then not a probability anymore since it can be  $> 1$ , but is a

173 score. Varying *sat* therefore allows for transiting from individual equivalence (but departure  
174 from pure species-sorting for infinite dispersal) to species equivalence (complying with  
175 species-sorting for infinite dispersal). Here, we used  $sat = 1$  to keep the complexity of the  
176 model low and more clearly analyse the results with species-sorting being a limiting case of  
177 the composite model.

#### 178 *(b) Simulation parameters*

179 We modelled 100 species, whose niche means were regularly spaced from 0.5 to 99.5 by an  
180 increment of 1. We varied the strengths of the neutral and niche filters by modifying the  
181 dispersal limitation (varying  $d$ , from 20, 10, 5 to 2 cells) and the degree of niche separation  
182 (varying  $\sigma$ , from 200, 100, 50, 25, 10 to 5). The spatial distribution of the environmental  
183 variable  $E$  was generated using a Gaussian random field (Package *gstat* version 1.0-19 in R  
184 3.0.2) [4, 5] with the range parameter of spatial autocorrelation set at 5 (large values result in  
185 high spatial autocorrelation). Since  $E$  follows a normal distribution, it was then transformed  
186 using its cumulative distribution function to obtain a uniform distribution, and rescaled  
187 between 0 and 100 (Figure C3). Note that we also performed simulations for 60 species in an  
188 environment generated with a range parameter of 10, but results were similar and thus not  
189 presented here. We initialised simulations by filling cells with randomly assigned individuals,  
190 with all species equally abundant. Initialising individuals based on their niche preference (i.e.  
191 using the niche process) led to the same results in the model. During each iteration 25% of  
192 individuals were randomly removed to represent ecological drift and the level of drift only  
193 affected the rate of convergence. We ran 1000 iterations for all simulations, replicating  
194 simulations 50 times for each parameter combination. Real convergence cannot be achieved  
195 in the model due to ecological drift except for strict niche separation. However, preliminary  
196 simulations with 5000 iterations have led to similar results, and 1000 iterations were thus

197 kept here for consistency. As immigration from a species pool was not implemented in the  
198 model to reduce complexity, we prevented monodominance by randomly assigning one  
199 individual of each extinct species to an empty location before each iteration.

## 200 REFERENCES

- 201 1. Bar-Massada A., Kent R., Carmel Y. 2014 Environmental heterogeneity affects the  
202 location of modelled communities along the niche–neutrality continuum. *Proceedings of the*  
203 *Royal Society B: Biological Sciences* **281**(1783), 20133249. (doi:10.1098/rspb.2013.3249).
- 204 2. Gravel D., Canham C.D., Beaudet M., Messier C. 2006 Reconciling niche and  
205 neutrality: the continuum hypothesis. *Ecol. Lett.* **9**(4), 399-409. (doi:10.1111/j.1461-  
206 0248.2006.00884.x).
- 207 3. Chave J. 2004 Neutral theory and community ecology. *Ecol. Lett.* **7**(3), 241-253.
- 208 4. Pebesma E.J. 2001 Gstat User’s Manual. (Department of Physical Geography,  
209 University of Utrecht.
- 210 5. R Core Team. 2013 R: A language and environment for statistical computing. (R  
211 Foundation for Statistical Computing, Vienna, Austria.
- 212

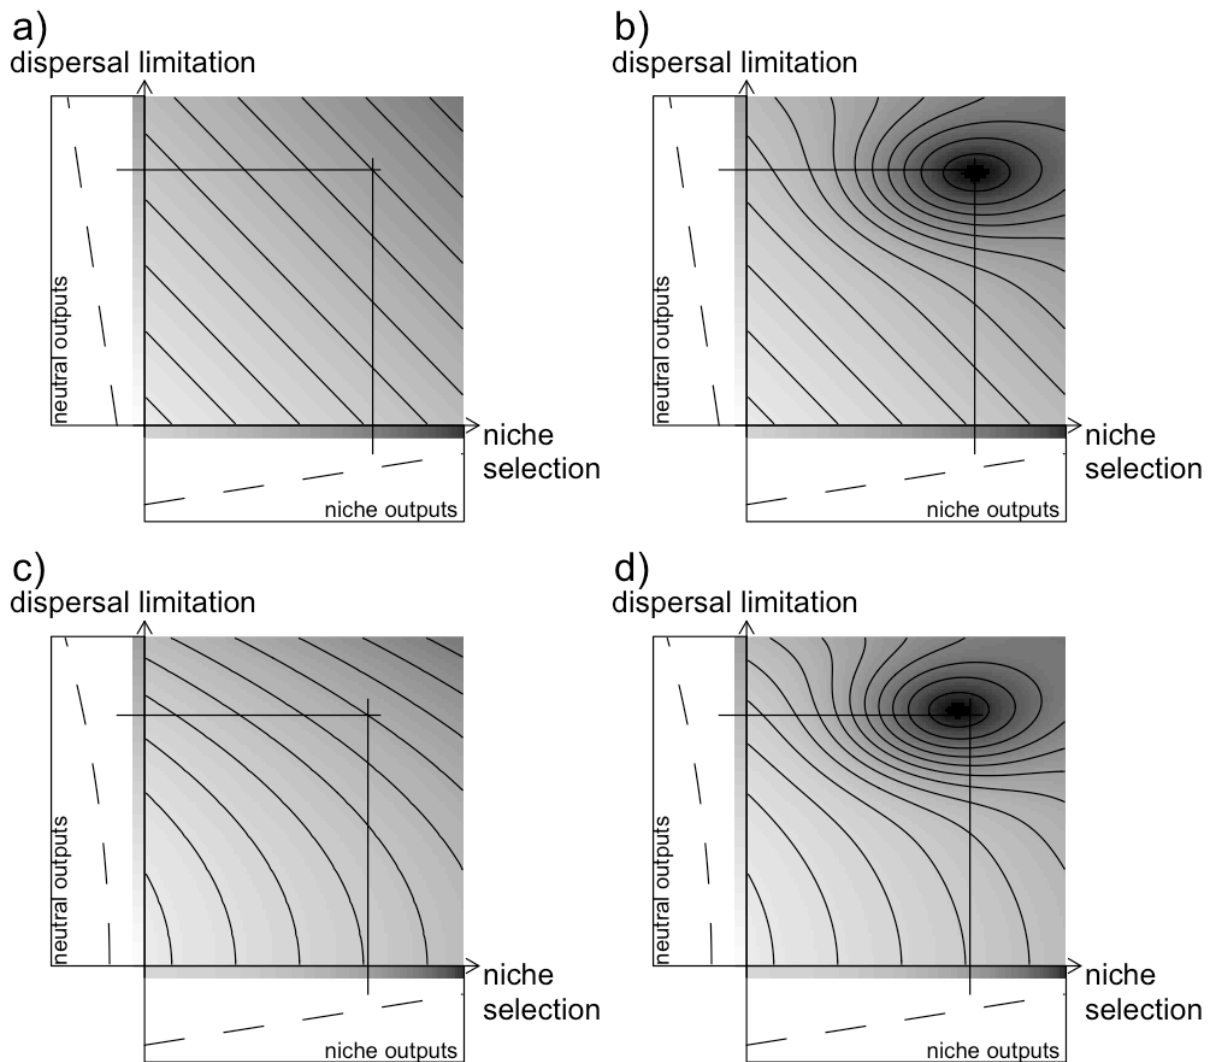

216 Figure C1. Theoretical representations of a pattern in the phase space delimited by  
 217 neutral and niche model outputs. The grey scale represents the hypothetical value of  
 218 a pattern, for example the AUC of the rank-abundance distributions. The x-axis,  
 219 when niche selection is null, corresponds to a neutral model outputs. The y-axis,  
 220 when dispersal limitation is null, corresponds to a niche model outputs. Each point of  
 221 the space therefore corresponds to a combination of neutral and niche processes, i.e.  
 222 to a composite model. a) Neutral and niche model outputs increase linearly with  
 223 niche selection and dispersal limitation, and the composite model outputs lie

224 between the neutral and niche model outputs for the same dispersal limitation and  
225 niche selection, i.e. corresponds to the neutral-niche continuum, and the isolines go  
226 from one axis to the other. b) in some part of the space, the composite model  
227 outputs lie outside of the neutral and niche model outputs for the same dispersal  
228 limitation and niche selection, and some isolines do not go from one axis to the other  
229 anymore. c,d) same example when the niche model outputs do not increase linearly  
230 with niche selection: the isolines are not linear.

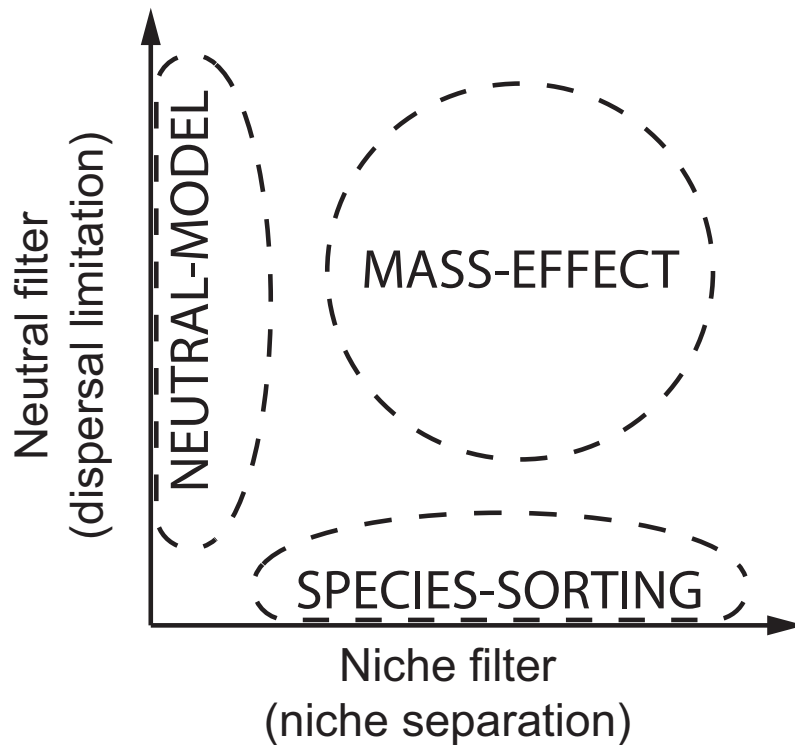

231

232 Figure C2. Three metacommunity paradigms qualitatively positioned in the  
 233 community assembly phase space for the simulations performed in this study. Each  
 234 axis represents the value of a parameter for the neutral and niche filters: dispersal  
 235 limitation and niche separation. CAPS is not restricted to two axes, but is versatile in  
 236 the number of filters it can accommodate (Appendix A). By quantifying the  
 237 differences community patterns depending on the values of the parameters, it will be  
 238 possible to determine the boundaries between the three paradigms. This  
 239 representation is similar to Figure 1 in Logue *et al.* (2011). However, here the axes  
 240 refer to community attributes, rather than characteristics of the environment, such as  
 241 heterogeneity, as in Logue *et al.* (2011), because we did not explore the effect of  
 242 varying the environment in this study. Axes representing characteristics of the  
 243 environment can nonetheless be represented in CAPS.

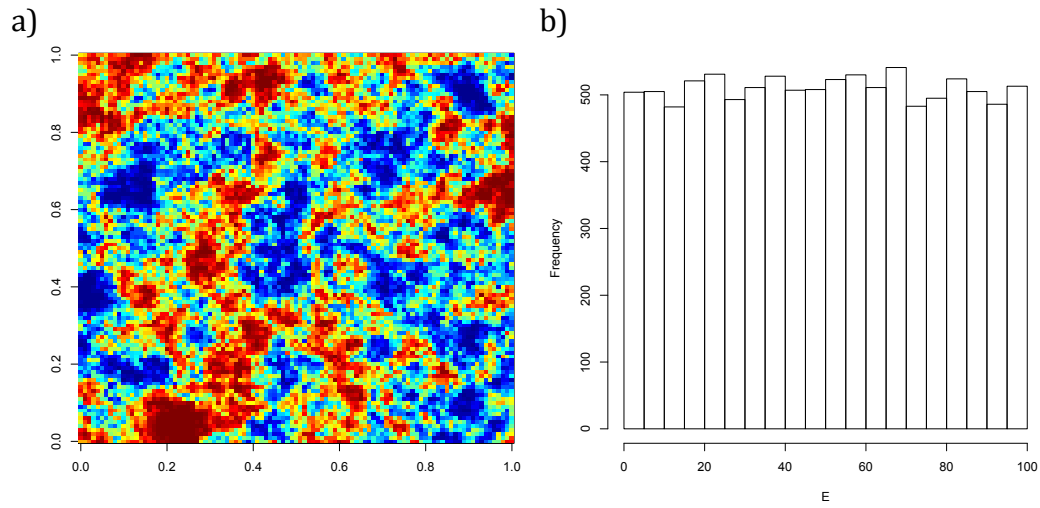

244

245 Figure C3. a) The configuration of the environmental data for a range coefficient of 5.

246 b) The corresponding histograms of the environmental variable  $E$ .



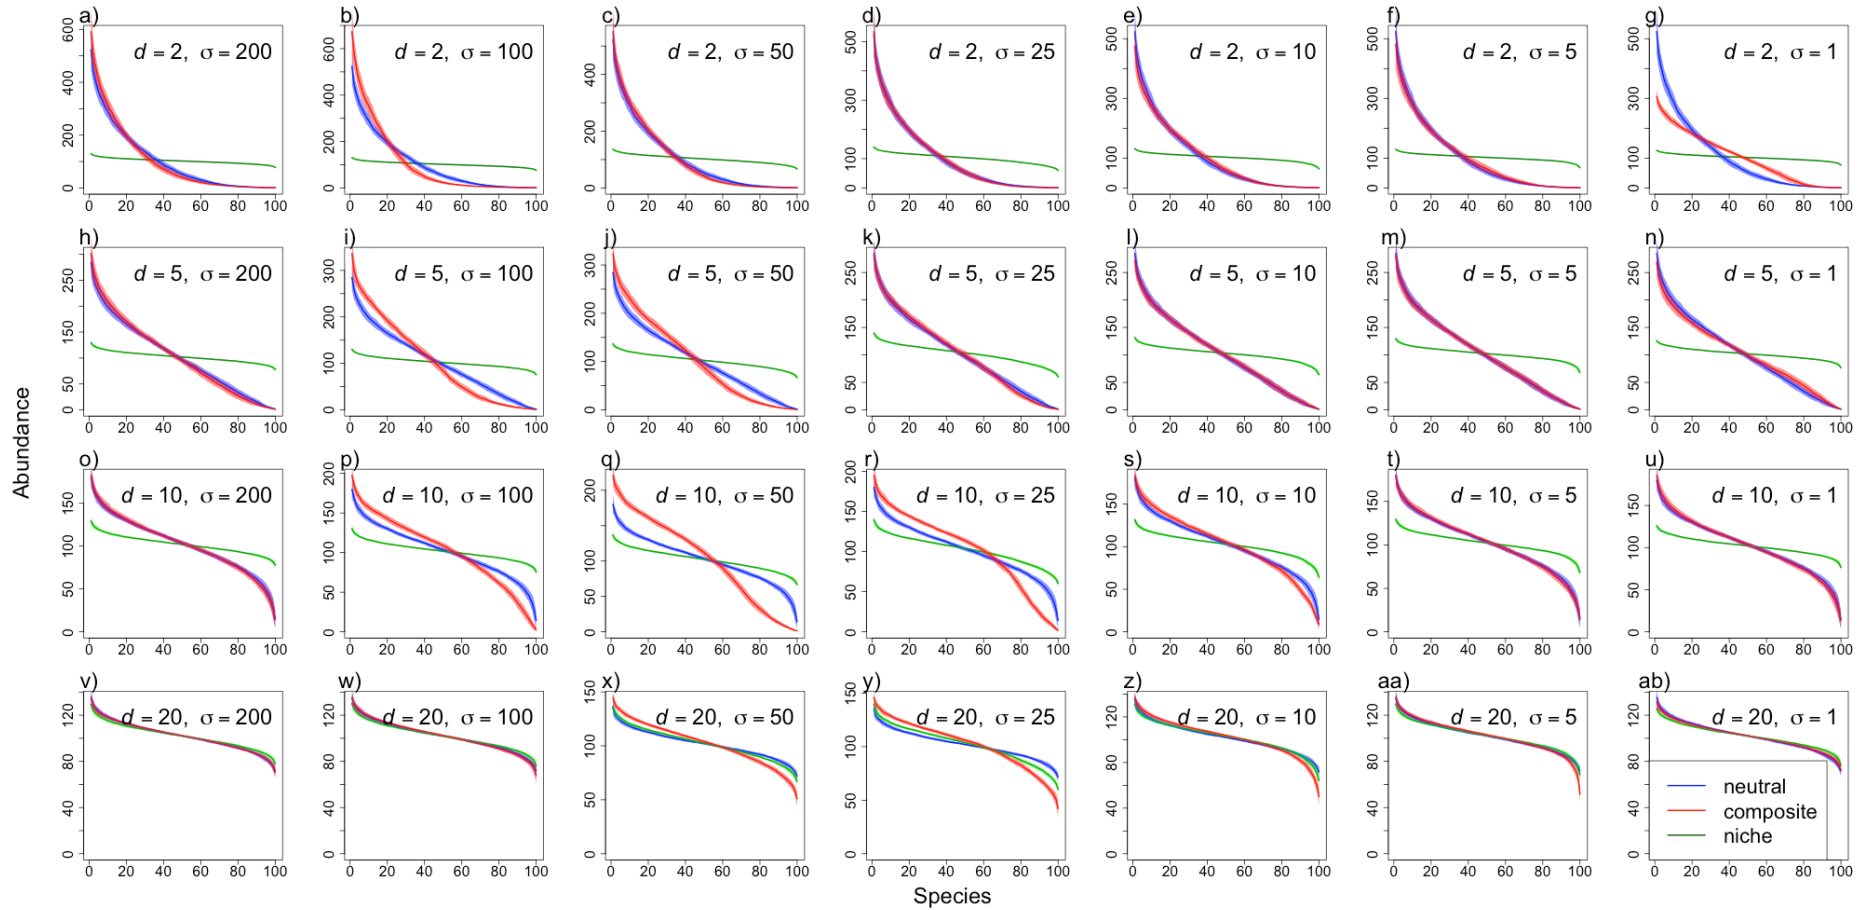

247

248 Figure C4. Rank abundance distributions for the range of neutral and niche parameters used in simulations. The shaded areas  
 249 represent the area between the 25% and 75% percentiles. The bottom-left figure corresponds to low dispersal limitation and niche  
 250 separation (large  $d$  and  $\sigma$ ) and is close to spatially random.

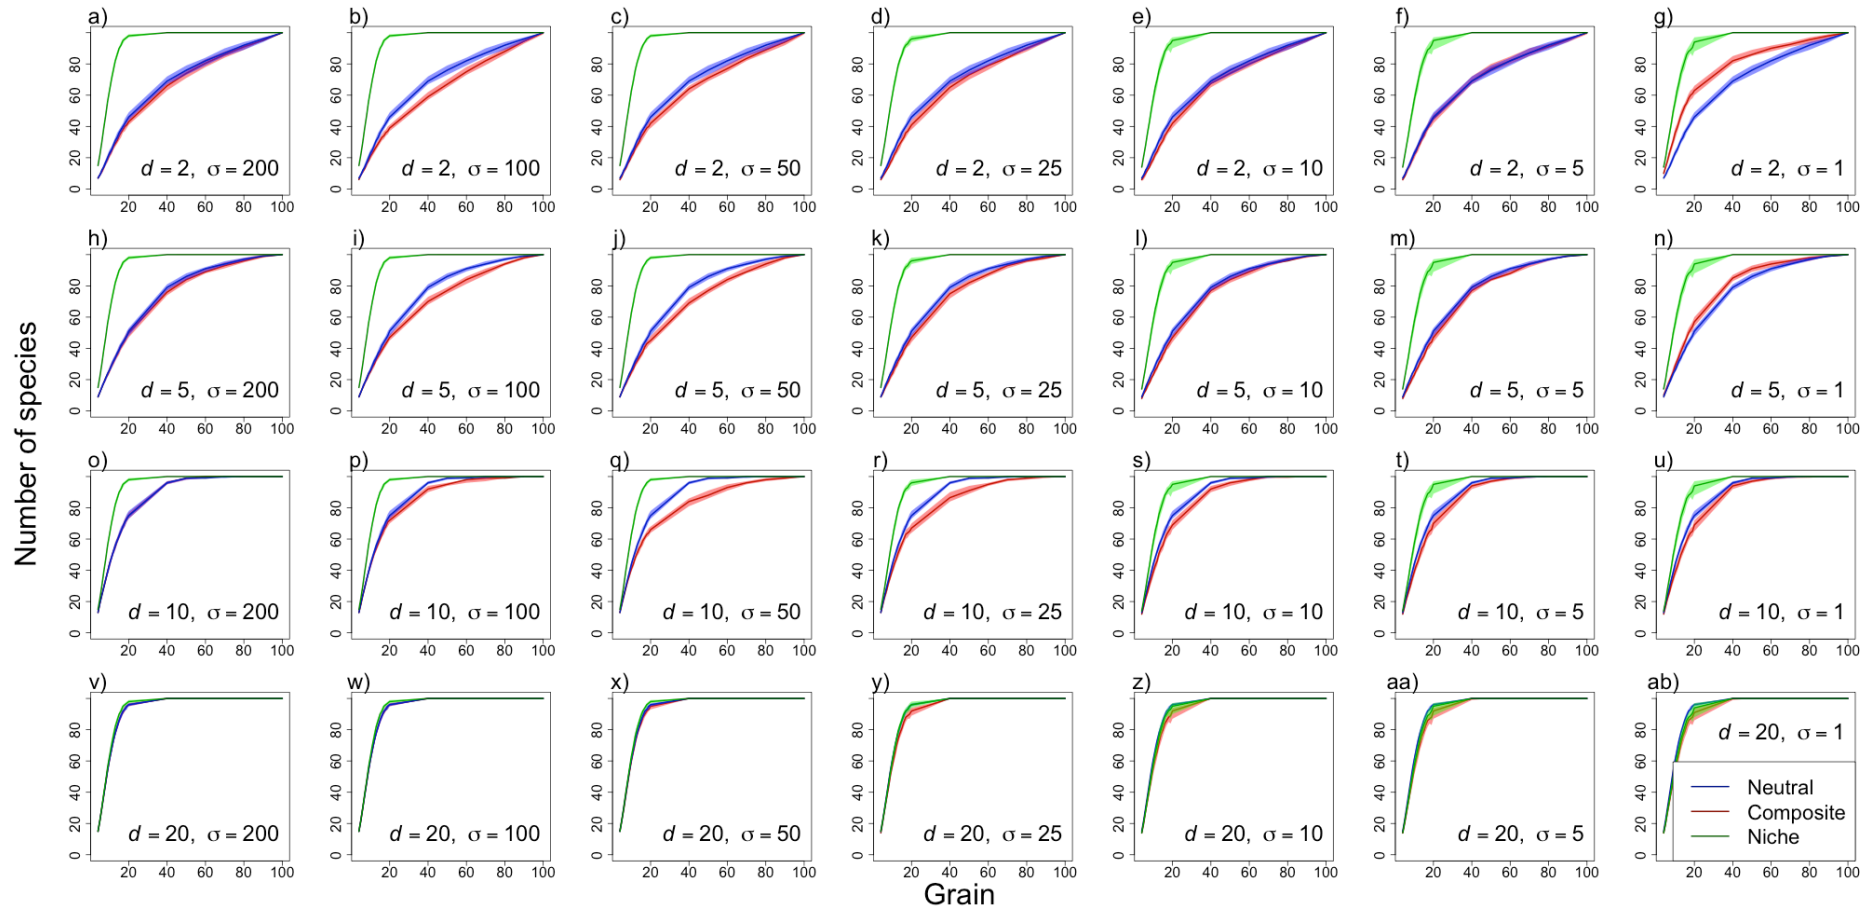

251

252 Figure C5. Species-area curves for the range of neutral and niche parameters used in simulations. The shaded areas represent the  
 253 area between the 25% and 75% percentiles. The bottom-left figure corresponds to low dispersal limitation and niche separation  
 254 (large  $d$  and  $\sigma$ ) and is close to spatially random.

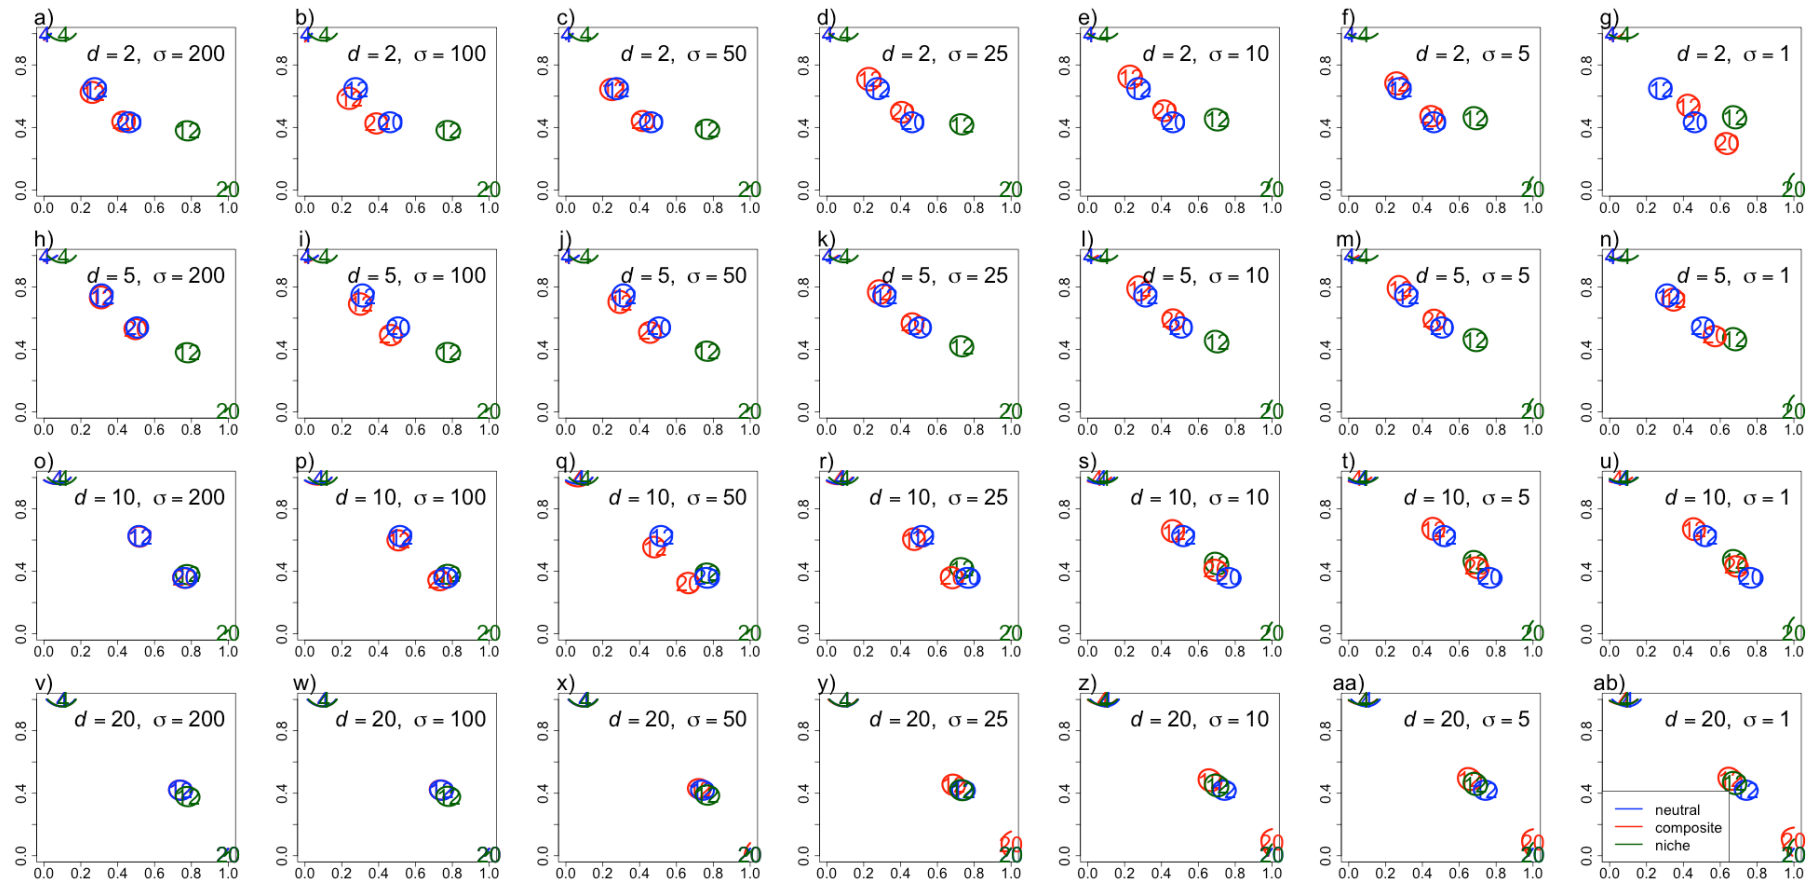

255

256

Figure C6. Density signatures for the range of neutral and niche parameters used in simulations. The numbers are placed on the

257

modes locations for each grain and the circles represent the 90% thresholds of the surface densities computed over all simulations.

258

The bottom-left figure corresponds to low dispersal limitation and niche separation (large  $d$  and  $\sigma$ ) and is close to spatially random.

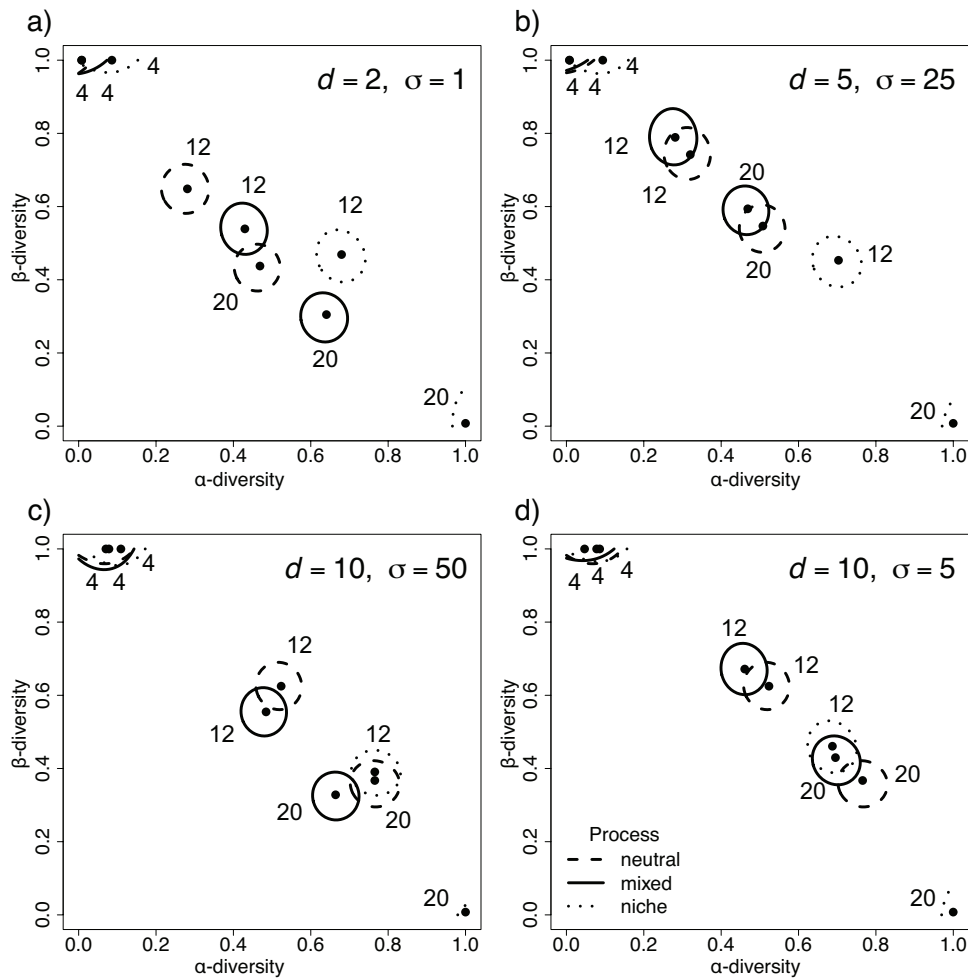

259

260 Figure C7. Snapshots of diversity signatures produced for niche, neutral and composite  
 261 model processes for different combinations (a-d) of dispersal ability  $d$  and niche width  $\sigma$ , at  
 262 three different grains (4, 12 and 20). The points represent the modes for each grain and  
 263 the circles represent the 90% thresholds of the surface densities computed over all  
 264 simulations. a) The composite outputs lie between the neutral and niche model outputs  
 265 and the modes of the diversity signatures are located between those of the neutral and  
 266 niche models; b) the composite outputs are equivalent to the expected neutral diversity  
 267 signature; c) the composite model diversity signature lies outside of the neutral and niche  
 268 model outputs and the  $\beta$ -diversity values are between neutral and niche, whereas  $\alpha$ -  
 269 diversity values are lower than both; d) the composite model diversity signature lies

270 outside of the neutral and niche model outputs and the  $\beta$ -diversity values are higher than  
271 both neutral and niche ones, whereas  $\alpha$ -diversity values are lower than both.

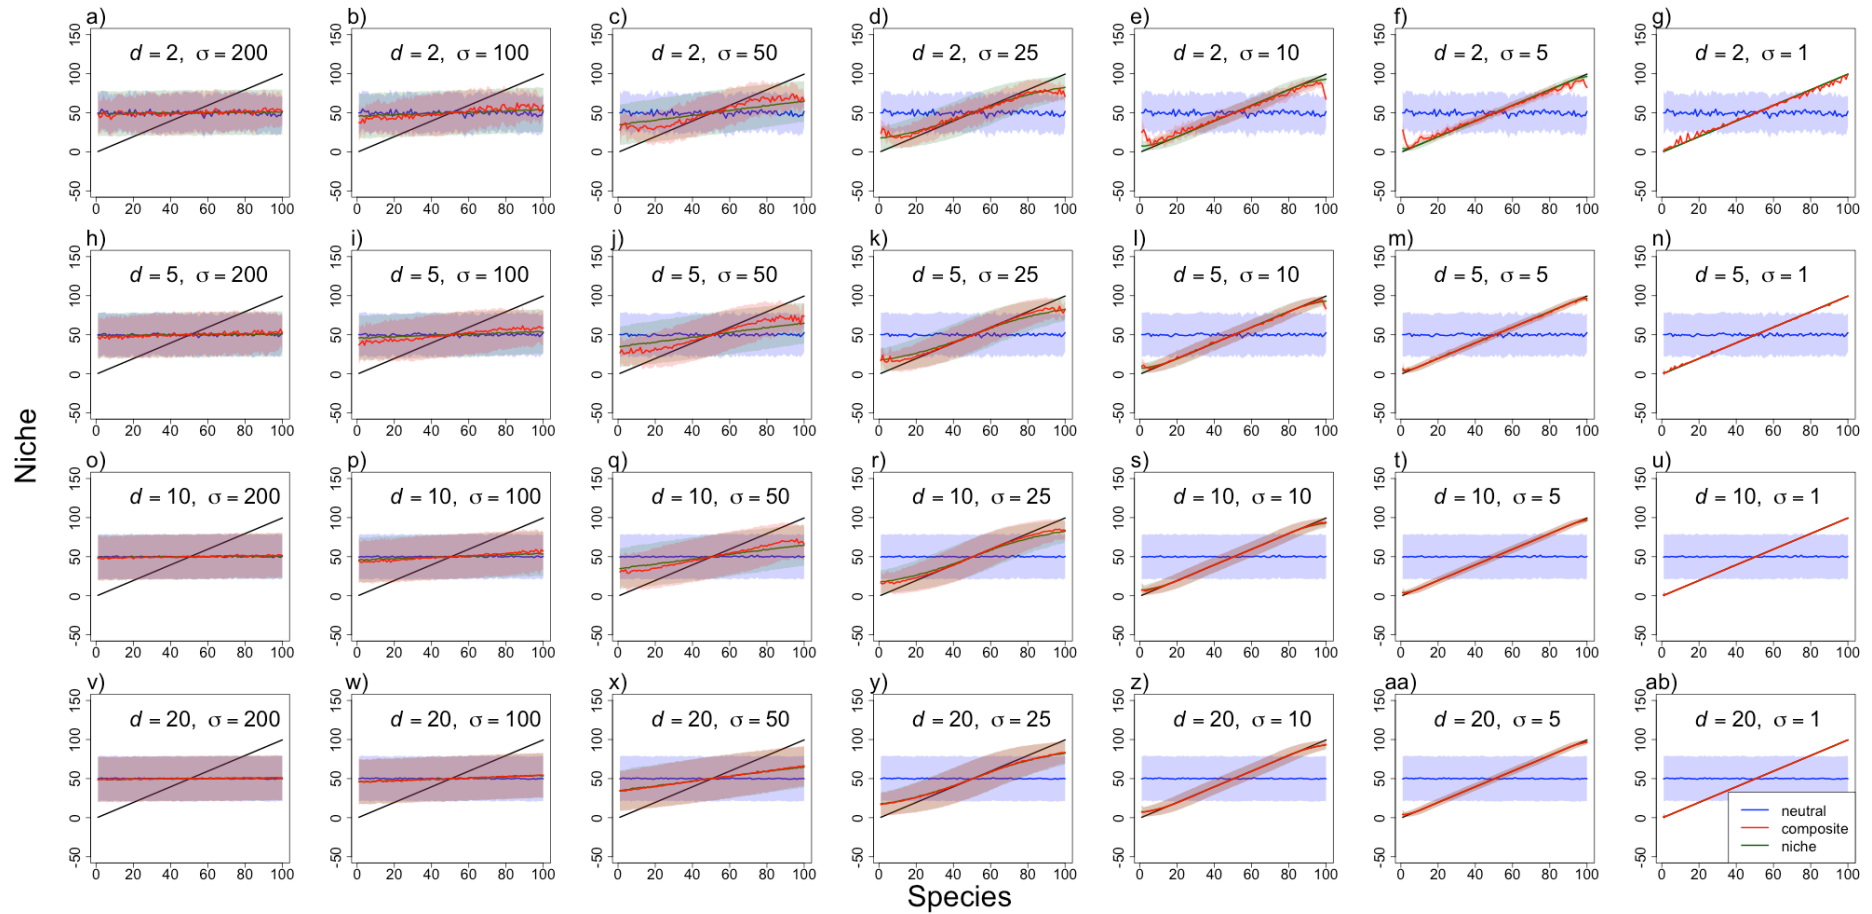

272

273

Figure C8. Realized niche per species when species are not sorted according to their realized niche, for the range of neutral and

274

niche parameters used in simulations. Lines represent the mean of the realized niche. The shaded areas represent the niche width.

275

The black line represents the fundamental niche optimum. The bottom-left figure corresponds to low dispersal limitation and niche

276

separation (large  $d$  and  $\sigma$ ) and is close to spatially random.

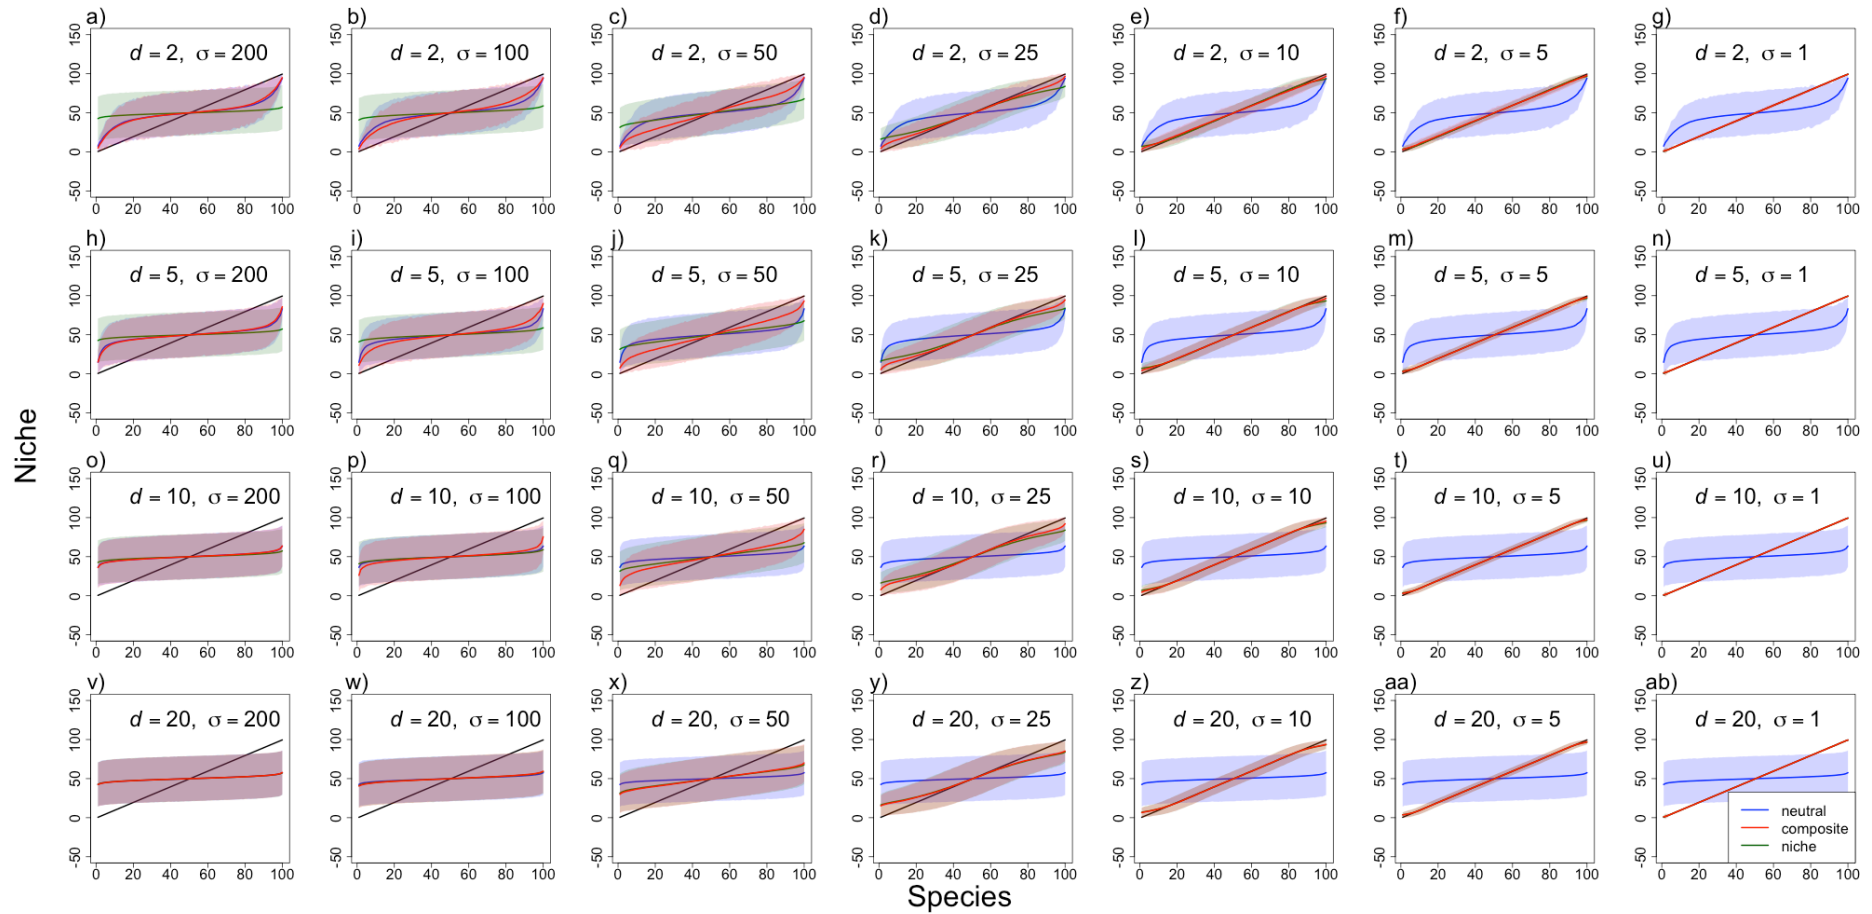

277

278 Figure C9. Realized niche per species when species are sorted according to their realized niche, for the range of neutral and niche  
 279 parameters used in simulations. Lines represent the mean of the realized niche. The shaded areas represent the niche width. The  
 280 black line represents the fundamental niche optimum. The bottom-left figure corresponds to low dispersal limitation and niche  
 281 separation (large  $d$  and  $\sigma$ ) and is close to spatially random.

Table D1.  $\alpha$ -diversity of the modes for the different models for grains 4 to 20 for the range of neutral and niche parameters used in

simulations.

| $d$   | $\sigma$    | model   | Grain |      |      |      |      |      |      |      |      |      |      |      |      |      |      |      |      |
|-------|-------------|---------|-------|------|------|------|------|------|------|------|------|------|------|------|------|------|------|------|------|
|       |             |         | 4     | 5    | 6    | 7    | 8    | 9    | 10   | 11   | 12   | 13   | 14   | 15   | 16   | 17   | 18   | 19   | 20   |
| $d=2$ | $\sigma=1$  | neutral | 0.01  | 0.01 | 0.04 | 0.09 | 0.14 | 0.18 | 0.22 | 0.25 | 0.28 | 0.31 | 0.34 | 0.36 | 0.38 | 0.41 | 0.43 | 0.45 | 0.47 |
|       |             | niche1  | 0.01  | 0.08 | 0.15 | 0.21 | 0.27 | 0.31 | 0.36 | 0.4  | 0.43 | 0.47 | 0.5  | 0.53 | 0.56 | 0.59 | 0.6  | 0.62 | 0.64 |
|       |             | niche   | 0.09  | 0.18 | 0.27 | 0.34 | 0.42 | 0.5  | 0.56 | 0.62 | 0.68 | 0.75 | 0.8  | 0.85 | 0.91 | 0.97 | 1    | 1    | 1    |
|       | $\sigma=5$  | neutral | 0.01  | 0.01 | 0.04 | 0.09 | 0.14 | 0.18 | 0.22 | 0.25 | 0.28 | 0.31 | 0.34 | 0.36 | 0.38 | 0.41 | 0.43 | 0.45 | 0.47 |
|       |             | niche1  | 0.01  | 0.01 | 0.02 | 0.08 | 0.12 | 0.17 | 0.2  | 0.23 | 0.27 | 0.3  | 0.32 | 0.34 | 0.38 | 0.4  | 0.41 | 0.43 | 0.45 |
|       |             | niche   | 0.09  | 0.19 | 0.27 | 0.35 | 0.43 | 0.5  | 0.57 | 0.63 | 0.69 | 0.76 | 0.81 | 0.87 | 0.92 | 0.99 | 1    | 1    | 1    |
|       | $\sigma=10$ | neutral | 0.01  | 0.01 | 0.04 | 0.09 | 0.14 | 0.18 | 0.22 | 0.25 | 0.28 | 0.31 | 0.34 | 0.36 | 0.38 | 0.41 | 0.43 | 0.45 | 0.47 |
|       |             | niche1  | 0.01  | 0.01 | 0.01 | 0.05 | 0.1  | 0.14 | 0.17 | 0.2  | 0.23 | 0.27 | 0.29 | 0.31 | 0.34 | 0.37 | 0.38 | 0.4  | 0.42 |
|       |             | niche   | 0.09  | 0.2  | 0.28 | 0.36 | 0.44 | 0.52 | 0.58 | 0.65 | 0.7  | 0.77 | 0.83 | 0.88 | 0.95 | 1    | 1    | 1    | 1    |
|       | $\sigma=25$ | neutral | 0.01  | 0.01 | 0.04 | 0.09 | 0.14 | 0.18 | 0.22 | 0.25 | 0.28 | 0.31 | 0.34 | 0.36 | 0.38 | 0.41 | 0.43 | 0.45 | 0.47 |
|       |             | niche1  | 0.01  | 0.01 | 0.01 | 0.05 | 0.1  | 0.14 | 0.17 | 0.2  | 0.23 | 0.27 | 0.29 | 0.31 | 0.34 | 0.36 | 0.38 | 0.4  | 0.41 |
|       |             | niche   | 0.1   | 0.2  | 0.29 | 0.38 | 0.45 | 0.53 | 0.61 | 0.67 | 0.73 | 0.8  | 0.86 | 0.92 | 1    | 1    | 1    | 1    | 1    |
|       | $\sigma=50$ | neutral | 0.01  | 0.01 | 0.04 | 0.09 | 0.14 | 0.18 | 0.22 | 0.25 | 0.28 | 0.31 | 0.34 | 0.36 | 0.38 | 0.41 | 0.43 | 0.45 | 0.47 |
|       |             | niche1  | 0.01  | 0.01 | 0.02 | 0.08 | 0.12 | 0.16 | 0.2  | 0.23 | 0.26 | 0.28 | 0.3  | 0.33 | 0.35 | 0.38 | 0.39 | 0.41 | 0.42 |



|              |             |        |      |      |      |      |      |      |      |      |      |      |      |      |      |      |      |      |      |
|--------------|-------------|--------|------|------|------|------|------|------|------|------|------|------|------|------|------|------|------|------|------|
|              | niche       | 0.11   | 0.21 | 0.3  | 0.39 | 0.48 | 0.55 | 0.63 | 0.7  | 0.77 | 0.84 | 0.9  | 0.98 | 1    | 1    | 1    | 1    | 1    |      |
|              | neutral     | 0.01   | 0.01 | 0.04 | 0.09 | 0.14 | 0.18 | 0.22 | 0.25 | 0.28 | 0.31 | 0.34 | 0.36 | 0.38 | 0.41 | 0.43 | 0.45 | 0.47 |      |
| $\sigma=100$ | niche1      | 0.01   | 0.01 | 0.03 | 0.08 | 0.12 | 0.16 | 0.2  | 0.22 | 0.25 | 0.27 | 0.29 | 0.31 | 0.33 | 0.34 | 0.36 | 0.38 | 0.39 |      |
|              | niche       | 0.11   | 0.21 | 0.3  | 0.39 | 0.48 | 0.56 | 0.64 | 0.71 | 0.78 | 0.84 | 0.91 | 1    | 1    | 1    | 1    | 1    | 1    |      |
|              | neutral     | 0.01   | 0.01 | 0.04 | 0.09 | 0.14 | 0.18 | 0.22 | 0.25 | 0.28 | 0.31 | 0.34 | 0.36 | 0.38 | 0.41 | 0.43 | 0.45 | 0.47 |      |
| $\sigma=200$ | niche1      | 0.01   | 0.01 | 0.04 | 0.09 | 0.13 | 0.17 | 0.21 | 0.24 | 0.27 | 0.3  | 0.32 | 0.34 | 0.36 | 0.38 | 0.4  | 0.41 | 0.44 |      |
|              | niche       | 0.11   | 0.21 | 0.3  | 0.39 | 0.48 | 0.56 | 0.64 | 0.71 | 0.78 | 0.84 | 0.92 | 1    | 1    | 1    | 1    | 1    | 1    |      |
|              | neutral     | 0.01   | 0.05 | 0.11 | 0.16 | 0.2  | 0.23 | 0.26 | 0.29 | 0.32 | 0.34 | 0.37 | 0.4  | 0.42 | 0.45 | 0.47 | 0.48 | 0.51 |      |
| $\sigma=1$   | niche1      | 0.01   | 0.06 | 0.12 | 0.16 | 0.21 | 0.25 | 0.29 | 0.32 | 0.35 | 0.39 | 0.41 | 0.45 | 0.48 | 0.51 | 0.52 | 0.55 | 0.57 |      |
|              | niche       | 0.09   | 0.18 | 0.27 | 0.34 | 0.42 | 0.5  | 0.56 | 0.62 | 0.68 | 0.75 | 0.8  | 0.85 | 0.91 | 0.97 | 1    | 1    | 1    |      |
|              | neutral     | 0.01   | 0.05 | 0.11 | 0.16 | 0.2  | 0.23 | 0.26 | 0.29 | 0.32 | 0.34 | 0.37 | 0.4  | 0.42 | 0.45 | 0.47 | 0.48 | 0.51 |      |
| $\sigma=5$   | niche1      | 0.01   | 0.02 | 0.08 | 0.12 | 0.16 | 0.2  | 0.23 | 0.25 | 0.28 | 0.31 | 0.34 | 0.36 | 0.39 | 0.41 | 0.43 | 0.45 | 0.47 |      |
|              | niche       | 0.09   | 0.19 | 0.27 | 0.35 | 0.43 | 0.5  | 0.57 | 0.63 | 0.69 | 0.76 | 0.81 | 0.87 | 0.92 | 0.99 | 1    | 1    | 1    |      |
|              | neutral     | 0.01   | 0.05 | 0.11 | 0.16 | 0.2  | 0.23 | 0.26 | 0.29 | 0.32 | 0.34 | 0.37 | 0.4  | 0.42 | 0.45 | 0.47 | 0.48 | 0.51 |      |
| $d=5$        | $\sigma=10$ | niche1 | 0.01 | 0.02 | 0.08 | 0.12 | 0.16 | 0.2  | 0.23 | 0.26 | 0.28 | 0.31 | 0.34 | 0.36 | 0.39 | 0.41 | 0.44 | 0.45 | 0.47 |
|              | niche       | 0.09   | 0.2  | 0.28 | 0.36 | 0.44 | 0.52 | 0.58 | 0.65 | 0.7  | 0.77 | 0.83 | 0.88 | 0.95 | 1    | 1    | 1    | 1    |      |
|              | neutral     | 0.01   | 0.05 | 0.11 | 0.16 | 0.2  | 0.23 | 0.26 | 0.29 | 0.32 | 0.34 | 0.37 | 0.4  | 0.42 | 0.45 | 0.47 | 0.48 | 0.51 |      |
| $\sigma=25$  | niche1      | 0.01   | 0.04 | 0.09 | 0.13 | 0.17 | 0.2  | 0.23 | 0.27 | 0.29 | 0.32 | 0.34 | 0.37 | 0.39 | 0.42 | 0.44 | 0.45 | 0.47 |      |
|              | niche       | 0.1    | 0.2  | 0.29 | 0.38 | 0.45 | 0.53 | 0.61 | 0.67 | 0.73 | 0.8  | 0.86 | 0.92 | 1    | 1    | 1    | 1    | 1    |      |
|              | neutral     | 0.01   | 0.05 | 0.11 | 0.16 | 0.2  | 0.23 | 0.26 | 0.29 | 0.32 | 0.34 | 0.37 | 0.4  | 0.42 | 0.45 | 0.47 | 0.48 | 0.51 |      |
| $\sigma=50$  | niche1      | 0.01   | 0.05 | 0.1  | 0.15 | 0.18 | 0.22 | 0.24 | 0.27 | 0.3  | 0.32 | 0.34 | 0.37 | 0.39 | 0.41 | 0.43 | 0.45 | 0.46 |      |

|              |             |        |      |      |      |      |      |      |      |      |      |      |      |      |      |      |      |      |     |
|--------------|-------------|--------|------|------|------|------|------|------|------|------|------|------|------|------|------|------|------|------|-----|
|              | niche       | 0.11   | 0.21 | 0.3  | 0.39 | 0.48 | 0.55 | 0.63 | 0.7  | 0.77 | 0.84 | 0.9  | 0.98 | 1    | 1    | 1    | 1    | 1    |     |
|              | neutral     | 0.01   | 0.05 | 0.11 | 0.16 | 0.2  | 0.23 | 0.26 | 0.29 | 0.32 | 0.34 | 0.37 | 0.4  | 0.42 | 0.45 | 0.47 | 0.48 | 0.51 |     |
| $\sigma=100$ | niche1      | 0.01   | 0.05 | 0.11 | 0.15 | 0.19 | 0.22 | 0.25 | 0.28 | 0.3  | 0.33 | 0.35 | 0.38 | 0.4  | 0.41 | 0.44 | 0.45 | 0.47 |     |
|              | niche       | 0.11   | 0.21 | 0.3  | 0.39 | 0.48 | 0.56 | 0.64 | 0.71 | 0.78 | 0.84 | 0.91 | 1    | 1    | 1    | 1    | 1    | 1    |     |
|              | neutral     | 0.01   | 0.05 | 0.11 | 0.16 | 0.2  | 0.23 | 0.26 | 0.29 | 0.32 | 0.34 | 0.37 | 0.4  | 0.42 | 0.45 | 0.47 | 0.48 | 0.51 |     |
| $\sigma=200$ | niche1      | 0.01   | 0.05 | 0.11 | 0.16 | 0.2  | 0.23 | 0.26 | 0.29 | 0.31 | 0.34 | 0.37 | 0.39 | 0.41 | 0.44 | 0.46 | 0.48 | 0.5  |     |
|              | niche       | 0.11   | 0.21 | 0.3  | 0.39 | 0.48 | 0.56 | 0.64 | 0.71 | 0.78 | 0.84 | 0.92 | 1    | 1    | 1    | 1    | 1    | 1    |     |
|              | neutral     | 0.08   | 0.16 | 0.23 | 0.29 | 0.34 | 0.39 | 0.44 | 0.48 | 0.52 | 0.56 | 0.59 | 0.62 | 0.66 | 0.69 | 0.71 | 0.74 | 0.77 |     |
| $\sigma=1$   | niche1      | 0.05   | 0.13 | 0.2  | 0.26 | 0.3  | 0.35 | 0.39 | 0.43 | 0.46 | 0.5  | 0.53 | 0.56 | 0.6  | 0.62 | 0.65 | 0.66 | 0.69 |     |
|              | niche       | 0.09   | 0.18 | 0.27 | 0.34 | 0.42 | 0.5  | 0.56 | 0.62 | 0.68 | 0.75 | 0.8  | 0.85 | 0.91 | 0.97 | 1    | 1    | 1    |     |
|              | neutral     | 0.08   | 0.16 | 0.23 | 0.29 | 0.34 | 0.39 | 0.44 | 0.48 | 0.52 | 0.56 | 0.59 | 0.62 | 0.66 | 0.69 | 0.71 | 0.74 | 0.77 |     |
| $\sigma=5$   | niche1      | 0.05   | 0.13 | 0.2  | 0.25 | 0.3  | 0.35 | 0.39 | 0.43 | 0.46 | 0.51 | 0.54 | 0.57 | 0.6  | 0.63 | 0.66 | 0.67 | 0.7  |     |
|              | niche       | 0.09   | 0.19 | 0.27 | 0.35 | 0.43 | 0.5  | 0.57 | 0.63 | 0.69 | 0.76 | 0.81 | 0.87 | 0.92 | 0.99 | 1    | 1    | 1    |     |
|              | neutral     | 0.08   | 0.16 | 0.23 | 0.29 | 0.34 | 0.39 | 0.44 | 0.48 | 0.52 | 0.56 | 0.59 | 0.62 | 0.66 | 0.69 | 0.71 | 0.74 | 0.77 |     |
| $d=10$       | $\sigma=10$ | niche1 | 0.05 | 0.14 | 0.2  | 0.26 | 0.3  | 0.35 | 0.4  | 0.43 | 0.47 | 0.51 | 0.54 | 0.57 | 0.6  | 0.63 | 0.66 | 0.67 | 0.7 |
|              | niche       | 0.09   | 0.2  | 0.28 | 0.36 | 0.44 | 0.52 | 0.58 | 0.65 | 0.7  | 0.77 | 0.83 | 0.88 | 0.95 | 1    | 1    | 1    | 1    |     |
|              | neutral     | 0.08   | 0.16 | 0.23 | 0.29 | 0.34 | 0.39 | 0.44 | 0.48 | 0.52 | 0.56 | 0.59 | 0.62 | 0.66 | 0.69 | 0.71 | 0.74 | 0.77 |     |
| $\sigma=25$  | niche1      | 0.07   | 0.15 | 0.22 | 0.27 | 0.32 | 0.37 | 0.41 | 0.44 | 0.48 | 0.52 | 0.54 | 0.57 | 0.6  | 0.63 | 0.65 | 0.66 | 0.68 |     |
|              | niche       | 0.1    | 0.2  | 0.29 | 0.38 | 0.45 | 0.53 | 0.61 | 0.67 | 0.73 | 0.8  | 0.86 | 0.92 | 1    | 1    | 1    | 1    | 1    |     |
|              | neutral     | 0.08   | 0.16 | 0.23 | 0.29 | 0.34 | 0.39 | 0.44 | 0.48 | 0.52 | 0.56 | 0.59 | 0.62 | 0.66 | 0.69 | 0.71 | 0.74 | 0.77 |     |
| $\sigma=50$  | niche1      | 0.07   | 0.16 | 0.23 | 0.28 | 0.33 | 0.38 | 0.41 | 0.45 | 0.48 | 0.52 | 0.54 | 0.57 | 0.59 | 0.62 | 0.63 | 0.65 | 0.66 |     |

|              |             |        |      |      |      |      |      |      |      |      |      |      |      |      |      |      |      |      |   |
|--------------|-------------|--------|------|------|------|------|------|------|------|------|------|------|------|------|------|------|------|------|---|
|              | niche       | 0.11   | 0.21 | 0.3  | 0.39 | 0.48 | 0.55 | 0.63 | 0.7  | 0.77 | 0.84 | 0.9  | 0.98 | 1    | 1    | 1    | 1    | 1    |   |
|              | neutral     | 0.08   | 0.16 | 0.23 | 0.29 | 0.34 | 0.39 | 0.44 | 0.48 | 0.52 | 0.56 | 0.59 | 0.62 | 0.66 | 0.69 | 0.71 | 0.74 | 0.77 |   |
| $\sigma=100$ | niche1      | 0.08   | 0.16 | 0.23 | 0.29 | 0.34 | 0.39 | 0.43 | 0.47 | 0.51 | 0.55 | 0.58 | 0.61 | 0.63 | 0.66 | 0.69 | 0.71 | 0.73 |   |
|              | niche       | 0.11   | 0.21 | 0.3  | 0.39 | 0.48 | 0.56 | 0.64 | 0.71 | 0.78 | 0.84 | 0.91 | 1    | 1    | 1    | 1    | 1    | 1    |   |
|              | neutral     | 0.08   | 0.16 | 0.23 | 0.29 | 0.34 | 0.39 | 0.44 | 0.48 | 0.52 | 0.56 | 0.59 | 0.62 | 0.66 | 0.69 | 0.71 | 0.74 | 0.77 |   |
| $\sigma=200$ | niche1      | 0.08   | 0.16 | 0.23 | 0.29 | 0.34 | 0.39 | 0.44 | 0.48 | 0.52 | 0.55 | 0.59 | 0.62 | 0.66 | 0.69 | 0.71 | 0.74 | 0.77 |   |
|              | niche       | 0.11   | 0.21 | 0.3  | 0.39 | 0.48 | 0.56 | 0.64 | 0.71 | 0.78 | 0.84 | 0.92 | 1    | 1    | 1    | 1    | 1    | 1    |   |
|              | neutral     | 0.1    | 0.21 | 0.3  | 0.38 | 0.46 | 0.54 | 0.62 | 0.68 | 0.74 | 0.8  | 0.86 | 0.92 | 0.98 | 1    | 1    | 1    | 1    |   |
| $\sigma=1$   | niche1      | 0.08   | 0.18 | 0.26 | 0.34 | 0.41 | 0.48 | 0.55 | 0.6  | 0.66 | 0.72 | 0.77 | 0.8  | 0.85 | 0.91 | 0.94 | 0.97 | 1    |   |
|              | niche       | 0.09   | 0.18 | 0.27 | 0.34 | 0.42 | 0.5  | 0.56 | 0.62 | 0.68 | 0.75 | 0.8  | 0.85 | 0.91 | 0.97 | 1    | 1    | 1    |   |
|              | neutral     | 0.1    | 0.21 | 0.3  | 0.38 | 0.46 | 0.54 | 0.62 | 0.68 | 0.74 | 0.8  | 0.86 | 0.92 | 0.98 | 1    | 1    | 1    | 1    |   |
| $\sigma=5$   | niche1      | 0.09   | 0.18 | 0.27 | 0.34 | 0.41 | 0.48 | 0.55 | 0.61 | 0.66 | 0.72 | 0.77 | 0.81 | 0.86 | 0.91 | 0.95 | 0.98 | 1    |   |
|              | niche       | 0.09   | 0.19 | 0.27 | 0.35 | 0.43 | 0.5  | 0.57 | 0.63 | 0.69 | 0.76 | 0.81 | 0.87 | 0.92 | 0.99 | 1    | 1    | 1    |   |
|              | neutral     | 0.1    | 0.21 | 0.3  | 0.38 | 0.46 | 0.54 | 0.62 | 0.68 | 0.74 | 0.8  | 0.86 | 0.92 | 0.98 | 1    | 1    | 1    | 1    |   |
| $d=20$       | $\sigma=10$ | niche1 | 0.09 | 0.19 | 0.27 | 0.34 | 0.42 | 0.49 | 0.55 | 0.62 | 0.66 | 0.73 | 0.77 | 0.82 | 0.87 | 0.92 | 0.96 | 0.98 | 1 |
|              | niche       | 0.09   | 0.2  | 0.28 | 0.36 | 0.44 | 0.52 | 0.58 | 0.65 | 0.7  | 0.77 | 0.83 | 0.88 | 0.95 | 1    | 1    | 1    | 1    |   |
|              | neutral     | 0.1    | 0.21 | 0.3  | 0.38 | 0.46 | 0.54 | 0.62 | 0.68 | 0.74 | 0.8  | 0.86 | 0.92 | 0.98 | 1    | 1    | 1    | 1    |   |
| $\sigma=25$  | niche1      | 0.1    | 0.2  | 0.28 | 0.36 | 0.44 | 0.51 | 0.58 | 0.63 | 0.69 | 0.75 | 0.8  | 0.84 | 0.89 | 0.95 | 0.98 | 1    | 1    |   |
|              | niche       | 0.1    | 0.2  | 0.29 | 0.38 | 0.45 | 0.53 | 0.61 | 0.67 | 0.73 | 0.8  | 0.86 | 0.92 | 1    | 1    | 1    | 1    | 1    |   |
|              | neutral     | 0.1    | 0.21 | 0.3  | 0.38 | 0.46 | 0.54 | 0.62 | 0.68 | 0.74 | 0.8  | 0.86 | 0.92 | 0.98 | 1    | 1    | 1    | 1    |   |
| $\sigma=50$  | niche1      | 0.1    | 0.2  | 0.3  | 0.38 | 0.45 | 0.53 | 0.6  | 0.66 | 0.73 | 0.78 | 0.84 | 0.89 | 0.95 | 1    | 1    | 1    | 1    |   |

|              |         |      |      |     |      |      |      |      |      |      |      |      |      |      |   |   |   |   |
|--------------|---------|------|------|-----|------|------|------|------|------|------|------|------|------|------|---|---|---|---|
|              | niche   | 0.11 | 0.21 | 0.3 | 0.39 | 0.48 | 0.55 | 0.63 | 0.7  | 0.77 | 0.84 | 0.9  | 0.98 | 1    | 1 | 1 | 1 | 1 |
|              | neutral | 0.1  | 0.21 | 0.3 | 0.38 | 0.46 | 0.54 | 0.62 | 0.68 | 0.74 | 0.8  | 0.86 | 0.92 | 0.98 | 1 | 1 | 1 | 1 |
| $\sigma=100$ | niche1  | 0.1  | 0.21 | 0.3 | 0.38 | 0.46 | 0.54 | 0.61 | 0.68 | 0.74 | 0.8  | 0.86 | 0.91 | 0.98 | 1 | 1 | 1 | 1 |
|              | niche   | 0.11 | 0.21 | 0.3 | 0.39 | 0.48 | 0.56 | 0.64 | 0.71 | 0.78 | 0.84 | 0.91 | 1    | 1    | 1 | 1 | 1 | 1 |
|              | neutral | 0.1  | 0.21 | 0.3 | 0.38 | 0.46 | 0.54 | 0.62 | 0.68 | 0.74 | 0.8  | 0.86 | 0.92 | 0.98 | 1 | 1 | 1 | 1 |
| $\sigma=200$ | niche1  | 0.1  | 0.21 | 0.3 | 0.38 | 0.46 | 0.54 | 0.62 | 0.68 | 0.74 | 0.8  | 0.86 | 0.92 | 0.98 | 1 | 1 | 1 | 1 |
|              | niche   | 0.11 | 0.21 | 0.3 | 0.39 | 0.48 | 0.56 | 0.64 | 0.71 | 0.78 | 0.84 | 0.92 | 1    | 1    | 1 | 1 | 1 | 1 |

286 Table D2.  $\beta$ -diversity of the modes for the different models for grains 4 to 20 for the range of neutral and niche parameters used in  
 287 simulations.

| $d$   | $\sigma$     | model   | Grain |      |      |      |      |      |      |      |      |      |      |      |      |      |      |      |      |
|-------|--------------|---------|-------|------|------|------|------|------|------|------|------|------|------|------|------|------|------|------|------|
|       |              |         | 4     | 5    | 6    | 7    | 8    | 9    | 10   | 11   | 12   | 13   | 14   | 15   | 16   | 17   | 18   | 19   | 20   |
| $d=2$ | $\sigma=1$   | neutral | 1     | 1    | 0.97 | 0.88 | 0.82 | 0.77 | 0.73 | 0.69 | 0.65 | 0.62 | 0.59 | 0.55 | 0.53 | 0.5  | 0.48 | 0.46 | 0.44 |
|       |              | niche1  | 1     | 1    | 0.91 | 0.81 | 0.73 | 0.68 | 0.63 | 0.59 | 0.54 | 0.49 | 0.46 | 0.42 | 0.39 | 0.36 | 0.34 | 0.33 | 0.3  |
|       |              | niche   | 1     | 1    | 0.93 | 0.81 | 0.73 | 0.66 | 0.59 | 0.52 | 0.47 | 0.4  | 0.34 | 0.29 | 0.23 | 0.18 | 0.13 | 0.09 | 0.01 |
|       | $\sigma=5$   | neutral | 1     | 1    | 0.97 | 0.88 | 0.82 | 0.77 | 0.73 | 0.69 | 0.65 | 0.62 | 0.59 | 0.55 | 0.53 | 0.5  | 0.48 | 0.46 | 0.44 |
|       |              | niche1  | 1     | 1    | 1    | 0.94 | 0.85 | 0.8  | 0.76 | 0.72 | 0.68 | 0.65 | 0.62 | 0.59 | 0.56 | 0.54 | 0.52 | 0.5  | 0.48 |
|       |              | niche   | 1     | 1    | 0.91 | 0.81 | 0.73 | 0.66 | 0.59 | 0.52 | 0.46 | 0.39 | 0.33 | 0.27 | 0.22 | 0.16 | 0.12 | 0.07 | 0.01 |
|       | $\sigma=10$  | neutral | 1     | 1    | 0.97 | 0.88 | 0.82 | 0.77 | 0.73 | 0.69 | 0.65 | 0.62 | 0.59 | 0.55 | 0.53 | 0.5  | 0.48 | 0.46 | 0.44 |
|       |              | niche1  | 1     | 1    | 1    | 1    | 0.91 | 0.84 | 0.8  | 0.76 | 0.73 | 0.69 | 0.66 | 0.63 | 0.59 | 0.57 | 0.55 | 0.53 | 0.51 |
|       |              | niche   | 1     | 1    | 0.9  | 0.8  | 0.73 | 0.65 | 0.59 | 0.52 | 0.45 | 0.38 | 0.32 | 0.27 | 0.2  | 0.13 | 0.09 | 0.05 | 0.01 |
|       | $\sigma=25$  | neutral | 1     | 1    | 0.97 | 0.88 | 0.82 | 0.77 | 0.73 | 0.69 | 0.65 | 0.62 | 0.59 | 0.55 | 0.53 | 0.5  | 0.48 | 0.46 | 0.44 |
|       |              | niche1  | 1     | 1    | 1    | 0.98 | 0.88 | 0.83 | 0.78 | 0.75 | 0.71 | 0.68 | 0.65 | 0.62 | 0.59 | 0.56 | 0.54 | 0.52 | 0.5  |
|       |              | niche   | 1     | 0.99 | 0.87 | 0.78 | 0.71 | 0.63 | 0.56 | 0.49 | 0.42 | 0.35 | 0.29 | 0.23 | 0.16 | 0.09 | 0.04 | 0.01 | 0.01 |
|       | $\sigma=50$  | neutral | 1     | 1    | 0.97 | 0.88 | 0.82 | 0.77 | 0.73 | 0.69 | 0.65 | 0.62 | 0.59 | 0.55 | 0.53 | 0.5  | 0.48 | 0.46 | 0.44 |
|       |              | niche1  | 1     | 1    | 0.97 | 0.88 | 0.81 | 0.77 | 0.72 | 0.68 | 0.65 | 0.61 | 0.59 | 0.55 | 0.52 | 0.5  | 0.48 | 0.46 | 0.45 |
|       |              | niche   | 1     | 0.97 | 0.86 | 0.77 | 0.7  | 0.62 | 0.55 | 0.47 | 0.39 | 0.32 | 0.25 | 0.18 | 0.11 | 0.02 | 0.01 | 0.01 | 0.01 |
|       | $\sigma=100$ | neutral | 1     | 1    | 0.97 | 0.88 | 0.82 | 0.77 | 0.73 | 0.69 | 0.65 | 0.62 | 0.59 | 0.55 | 0.53 | 0.5  | 0.48 | 0.46 | 0.44 |

|              |         |   |      |      |      |      |      |      |      |      |      |      |      |      |      |      |      |      |
|--------------|---------|---|------|------|------|------|------|------|------|------|------|------|------|------|------|------|------|------|
|              | niche1  | 1 | 1    | 0.87 | 0.8  | 0.75 | 0.7  | 0.66 | 0.62 | 0.59 | 0.55 | 0.53 | 0.51 | 0.49 | 0.47 | 0.45 | 0.44 | 0.43 |
|              | niche   | 1 | 0.97 | 0.86 | 0.77 | 0.7  | 0.62 | 0.54 | 0.46 | 0.38 | 0.31 | 0.24 | 0.16 | 0.09 | 0.01 | 0.01 | 0.01 | 0.01 |
|              | neutral | 1 | 1    | 0.97 | 0.88 | 0.82 | 0.77 | 0.73 | 0.69 | 0.65 | 0.62 | 0.59 | 0.55 | 0.53 | 0.5  | 0.48 | 0.46 | 0.44 |
| $\sigma=200$ | niche1  | 1 | 1    | 0.92 | 0.84 | 0.79 | 0.74 | 0.7  | 0.66 | 0.62 | 0.59 | 0.56 | 0.54 | 0.52 | 0.49 | 0.48 | 0.46 | 0.45 |
|              | niche   | 1 | 0.97 | 0.86 | 0.77 | 0.7  | 0.62 | 0.54 | 0.46 | 0.38 | 0.31 | 0.23 | 0.16 | 0.09 | 0.01 | 0.01 | 0.01 | 0.01 |
|              | neutral | 1 | 1    | 1    | 0.95 | 0.89 | 0.84 | 0.8  | 0.77 | 0.74 | 0.72 | 0.69 | 0.66 | 0.64 | 0.61 | 0.59 | 0.57 | 0.55 |
| $\sigma=1$   | niche1  | 1 | 1    | 1    | 0.96 | 0.88 | 0.83 | 0.78 | 0.75 | 0.72 | 0.68 | 0.66 | 0.62 | 0.59 | 0.56 | 0.54 | 0.52 | 0.49 |
|              | niche   | 1 | 1    | 0.93 | 0.81 | 0.73 | 0.66 | 0.59 | 0.52 | 0.47 | 0.4  | 0.34 | 0.29 | 0.23 | 0.18 | 0.13 | 0.09 | 0.01 |
|              | neutral | 1 | 1    | 1    | 0.95 | 0.89 | 0.84 | 0.8  | 0.77 | 0.74 | 0.72 | 0.69 | 0.66 | 0.64 | 0.61 | 0.59 | 0.57 | 0.55 |
| $\sigma=5$   | niche1  | 1 | 1    | 1    | 1    | 0.97 | 0.9  | 0.86 | 0.82 | 0.79 | 0.75 | 0.73 | 0.7  | 0.68 | 0.65 | 0.63 | 0.61 | 0.59 |
|              | niche   | 1 | 1    | 0.91 | 0.81 | 0.73 | 0.66 | 0.59 | 0.52 | 0.46 | 0.39 | 0.33 | 0.27 | 0.22 | 0.16 | 0.12 | 0.07 | 0.01 |
|              | neutral | 1 | 1    | 1    | 0.95 | 0.89 | 0.84 | 0.8  | 0.77 | 0.74 | 0.72 | 0.69 | 0.66 | 0.64 | 0.61 | 0.59 | 0.57 | 0.55 |
| $\sigma=10$  | niche1  | 1 | 1    | 1    | 1    | 0.96 | 0.91 | 0.86 | 0.82 | 0.79 | 0.76 | 0.73 | 0.71 | 0.68 | 0.65 | 0.63 | 0.61 | 0.59 |
|              | niche   | 1 | 1    | 0.9  | 0.8  | 0.73 | 0.65 | 0.59 | 0.52 | 0.45 | 0.38 | 0.32 | 0.27 | 0.2  | 0.13 | 0.09 | 0.05 | 0.01 |
|              | neutral | 1 | 1    | 1    | 0.95 | 0.89 | 0.84 | 0.8  | 0.77 | 0.74 | 0.72 | 0.69 | 0.66 | 0.64 | 0.61 | 0.59 | 0.57 | 0.55 |
| $\sigma=25$  | niche1  | 1 | 1    | 1    | 1    | 0.92 | 0.88 | 0.83 | 0.8  | 0.77 | 0.73 | 0.71 | 0.69 | 0.66 | 0.62 | 0.61 | 0.59 | 0.57 |
|              | niche   | 1 | 0.99 | 0.87 | 0.78 | 0.71 | 0.63 | 0.56 | 0.49 | 0.42 | 0.35 | 0.29 | 0.23 | 0.16 | 0.09 | 0.04 | 0.01 | 0.01 |
|              | neutral | 1 | 1    | 1    | 0.95 | 0.89 | 0.84 | 0.8  | 0.77 | 0.74 | 0.72 | 0.69 | 0.66 | 0.64 | 0.61 | 0.59 | 0.57 | 0.55 |
| $\sigma=50$  | niche1  | 1 | 1    | 0.98 | 0.9  | 0.84 | 0.8  | 0.77 | 0.73 | 0.7  | 0.68 | 0.65 | 0.62 | 0.6  | 0.58 | 0.55 | 0.53 | 0.52 |
|              | niche   | 1 | 0.97 | 0.86 | 0.77 | 0.7  | 0.62 | 0.55 | 0.47 | 0.39 | 0.32 | 0.25 | 0.18 | 0.11 | 0.02 | 0.01 | 0.01 | 0.01 |
| $\sigma=100$ | neutral | 1 | 1    | 1    | 0.95 | 0.89 | 0.84 | 0.8  | 0.77 | 0.74 | 0.72 | 0.69 | 0.66 | 0.64 | 0.61 | 0.59 | 0.57 | 0.55 |

|              |         |   |      |      |      |      |      |      |      |      |      |      |      |      |      |      |      |      |
|--------------|---------|---|------|------|------|------|------|------|------|------|------|------|------|------|------|------|------|------|
|              | niche1  | 1 | 1    | 0.95 | 0.88 | 0.83 | 0.79 | 0.76 | 0.72 | 0.7  | 0.66 | 0.63 | 0.61 | 0.59 | 0.55 | 0.54 | 0.52 | 0.49 |
|              | niche   | 1 | 0.97 | 0.86 | 0.77 | 0.7  | 0.62 | 0.54 | 0.46 | 0.38 | 0.31 | 0.24 | 0.16 | 0.09 | 0.01 | 0.01 | 0.01 | 0.01 |
|              | neutral | 1 | 1    | 1    | 0.95 | 0.89 | 0.84 | 0.8  | 0.77 | 0.74 | 0.72 | 0.69 | 0.66 | 0.64 | 0.61 | 0.59 | 0.57 | 0.55 |
| $\sigma=200$ | niche1  | 1 | 1    | 1    | 0.93 | 0.88 | 0.84 | 0.8  | 0.77 | 0.73 | 0.7  | 0.68 | 0.65 | 0.62 | 0.6  | 0.58 | 0.55 | 0.53 |
|              | niche   | 1 | 0.97 | 0.86 | 0.77 | 0.7  | 0.62 | 0.54 | 0.46 | 0.38 | 0.31 | 0.23 | 0.16 | 0.09 | 0.01 | 0.01 | 0.01 | 0.01 |
|              | neutral | 1 | 1    | 0.92 | 0.85 | 0.8  | 0.75 | 0.7  | 0.66 | 0.62 | 0.59 | 0.55 | 0.52 | 0.48 | 0.45 | 0.42 | 0.39 | 0.37 |
| $\sigma=1$   | niche1  | 1 | 1    | 1    | 0.9  | 0.83 | 0.78 | 0.74 | 0.7  | 0.67 | 0.63 | 0.6  | 0.57 | 0.54 | 0.51 | 0.48 | 0.47 | 0.44 |
|              | niche   | 1 | 1    | 0.93 | 0.81 | 0.73 | 0.66 | 0.59 | 0.52 | 0.47 | 0.4  | 0.34 | 0.29 | 0.23 | 0.18 | 0.13 | 0.09 | 0.01 |
|              | neutral | 1 | 1    | 0.92 | 0.85 | 0.8  | 0.75 | 0.7  | 0.66 | 0.62 | 0.59 | 0.55 | 0.52 | 0.48 | 0.45 | 0.42 | 0.39 | 0.37 |
| $\sigma=5$   | niche1  | 1 | 1    | 1    | 0.91 | 0.84 | 0.79 | 0.74 | 0.7  | 0.67 | 0.63 | 0.6  | 0.57 | 0.53 | 0.5  | 0.48 | 0.46 | 0.43 |
|              | niche   | 1 | 1    | 0.91 | 0.81 | 0.73 | 0.66 | 0.59 | 0.52 | 0.46 | 0.39 | 0.33 | 0.27 | 0.22 | 0.16 | 0.12 | 0.07 | 0.01 |
|              | neutral | 1 | 1    | 0.92 | 0.85 | 0.8  | 0.75 | 0.7  | 0.66 | 0.62 | 0.59 | 0.55 | 0.52 | 0.48 | 0.45 | 0.42 | 0.39 | 0.37 |
| $\sigma=10$  | niche1  | 1 | 1    | 0.99 | 0.89 | 0.83 | 0.77 | 0.73 | 0.7  | 0.66 | 0.62 | 0.59 | 0.55 | 0.52 | 0.48 | 0.46 | 0.44 | 0.41 |
| $d=10$       | niche   | 1 | 1    | 0.9  | 0.8  | 0.73 | 0.65 | 0.59 | 0.52 | 0.45 | 0.38 | 0.32 | 0.27 | 0.2  | 0.13 | 0.09 | 0.05 | 0.01 |
|              | neutral | 1 | 1    | 0.92 | 0.85 | 0.8  | 0.75 | 0.7  | 0.66 | 0.62 | 0.59 | 0.55 | 0.52 | 0.48 | 0.45 | 0.42 | 0.39 | 0.37 |
| $\sigma=25$  | niche1  | 1 | 1    | 0.91 | 0.84 | 0.77 | 0.73 | 0.69 | 0.65 | 0.61 | 0.57 | 0.53 | 0.5  | 0.47 | 0.43 | 0.41 | 0.39 | 0.37 |
|              | niche   | 1 | 0.99 | 0.87 | 0.78 | 0.71 | 0.63 | 0.56 | 0.49 | 0.42 | 0.35 | 0.29 | 0.23 | 0.16 | 0.09 | 0.04 | 0.01 | 0.01 |
|              | neutral | 1 | 1    | 0.92 | 0.85 | 0.8  | 0.75 | 0.7  | 0.66 | 0.62 | 0.59 | 0.55 | 0.52 | 0.48 | 0.45 | 0.42 | 0.39 | 0.37 |
| $\sigma=50$  | niche1  | 1 | 0.95 | 0.85 | 0.79 | 0.73 | 0.69 | 0.64 | 0.6  | 0.55 | 0.52 | 0.48 | 0.45 | 0.42 | 0.4  | 0.38 | 0.35 | 0.33 |
|              | niche   | 1 | 0.97 | 0.86 | 0.77 | 0.7  | 0.62 | 0.55 | 0.47 | 0.39 | 0.32 | 0.25 | 0.18 | 0.11 | 0.02 | 0.01 | 0.01 | 0.01 |
| $\sigma=100$ | neutral | 1 | 1    | 0.92 | 0.85 | 0.8  | 0.75 | 0.7  | 0.66 | 0.62 | 0.59 | 0.55 | 0.52 | 0.48 | 0.45 | 0.42 | 0.39 | 0.37 |

|              |         |   |      |      |      |      |      |      |      |      |      |      |      |      |      |      |      |      |
|--------------|---------|---|------|------|------|------|------|------|------|------|------|------|------|------|------|------|------|------|
|              | niche1  | 1 | 0.99 | 0.89 | 0.82 | 0.77 | 0.73 | 0.68 | 0.64 | 0.6  | 0.56 | 0.53 | 0.49 | 0.46 | 0.43 | 0.4  | 0.38 | 0.34 |
|              | niche   | 1 | 0.97 | 0.86 | 0.77 | 0.7  | 0.62 | 0.54 | 0.46 | 0.38 | 0.31 | 0.24 | 0.16 | 0.09 | 0.01 | 0.01 | 0.01 | 0.01 |
|              | neutral | 1 | 1    | 0.92 | 0.85 | 0.8  | 0.75 | 0.7  | 0.66 | 0.62 | 0.59 | 0.55 | 0.52 | 0.48 | 0.45 | 0.42 | 0.39 | 0.37 |
| $\sigma=200$ | niche1  | 1 | 1    | 0.91 | 0.84 | 0.79 | 0.75 | 0.7  | 0.66 | 0.62 | 0.59 | 0.55 | 0.52 | 0.48 | 0.45 | 0.42 | 0.39 | 0.36 |
|              | niche   | 1 | 0.97 | 0.86 | 0.77 | 0.7  | 0.62 | 0.54 | 0.46 | 0.38 | 0.31 | 0.23 | 0.16 | 0.09 | 0.01 | 0.01 | 0.01 | 0.01 |
|              | neutral | 1 | 0.98 | 0.86 | 0.78 | 0.7  | 0.63 | 0.56 | 0.49 | 0.42 | 0.36 | 0.3  | 0.23 | 0.18 | 0.11 | 0.05 | 0.01 | 0.01 |
| $\sigma=1$   | niche1  | 1 | 1    | 0.93 | 0.82 | 0.74 | 0.67 | 0.61 | 0.55 | 0.49 | 0.43 | 0.38 | 0.34 | 0.28 | 0.23 | 0.2  | 0.16 | 0.1  |
|              | niche   | 1 | 1    | 0.93 | 0.81 | 0.73 | 0.66 | 0.59 | 0.52 | 0.47 | 0.4  | 0.34 | 0.29 | 0.23 | 0.18 | 0.13 | 0.09 | 0.01 |
|              | neutral | 1 | 0.98 | 0.86 | 0.78 | 0.7  | 0.63 | 0.56 | 0.49 | 0.42 | 0.36 | 0.3  | 0.23 | 0.18 | 0.11 | 0.05 | 0.01 | 0.01 |
| $\sigma=5$   | niche1  | 1 | 1    | 0.92 | 0.82 | 0.74 | 0.67 | 0.61 | 0.55 | 0.49 | 0.43 | 0.38 | 0.33 | 0.27 | 0.23 | 0.2  | 0.16 | 0.09 |
|              | niche   | 1 | 1    | 0.91 | 0.81 | 0.73 | 0.66 | 0.59 | 0.52 | 0.46 | 0.39 | 0.33 | 0.27 | 0.22 | 0.16 | 0.12 | 0.07 | 0.01 |
|              | neutral | 1 | 0.98 | 0.86 | 0.78 | 0.7  | 0.63 | 0.56 | 0.49 | 0.42 | 0.36 | 0.3  | 0.23 | 0.18 | 0.11 | 0.05 | 0.01 | 0.01 |
| $\sigma=10$  | niche1  | 1 | 1    | 0.91 | 0.81 | 0.73 | 0.66 | 0.6  | 0.54 | 0.48 | 0.42 | 0.37 | 0.32 | 0.27 | 0.22 | 0.18 | 0.15 | 0.09 |
| $d=20$       | niche   | 1 | 1    | 0.9  | 0.8  | 0.73 | 0.65 | 0.59 | 0.52 | 0.45 | 0.38 | 0.32 | 0.27 | 0.2  | 0.13 | 0.09 | 0.05 | 0.01 |
|              | neutral | 1 | 0.98 | 0.86 | 0.78 | 0.7  | 0.63 | 0.56 | 0.49 | 0.42 | 0.36 | 0.3  | 0.23 | 0.18 | 0.11 | 0.05 | 0.01 | 0.01 |
| $\sigma=25$  | niche1  | 1 | 0.99 | 0.87 | 0.79 | 0.71 | 0.65 | 0.58 | 0.52 | 0.46 | 0.4  | 0.34 | 0.29 | 0.24 | 0.19 | 0.16 | 0.12 | 0.08 |
|              | niche   | 1 | 0.99 | 0.87 | 0.78 | 0.71 | 0.63 | 0.56 | 0.49 | 0.42 | 0.35 | 0.29 | 0.23 | 0.16 | 0.09 | 0.04 | 0.01 | 0.01 |
|              | neutral | 1 | 0.98 | 0.86 | 0.78 | 0.7  | 0.63 | 0.56 | 0.49 | 0.42 | 0.36 | 0.3  | 0.23 | 0.18 | 0.11 | 0.05 | 0.01 | 0.01 |
| $\sigma=50$  | niche1  | 1 | 0.97 | 0.86 | 0.78 | 0.7  | 0.63 | 0.57 | 0.5  | 0.43 | 0.37 | 0.31 | 0.25 | 0.2  | 0.15 | 0.1  | 0.05 | 0.01 |
|              | niche   | 1 | 0.97 | 0.86 | 0.77 | 0.7  | 0.62 | 0.55 | 0.47 | 0.39 | 0.32 | 0.25 | 0.18 | 0.11 | 0.02 | 0.01 | 0.01 | 0.01 |
| $\sigma=100$ | neutral | 1 | 0.98 | 0.86 | 0.78 | 0.7  | 0.63 | 0.56 | 0.49 | 0.42 | 0.36 | 0.3  | 0.23 | 0.18 | 0.11 | 0.05 | 0.01 | 0.01 |



|              |         |   |      |      |      |     |      |      |      |      |      |      |      |      |      |      |      |      |
|--------------|---------|---|------|------|------|-----|------|------|------|------|------|------|------|------|------|------|------|------|
|              | niche1  | 1 | 0.98 | 0.86 | 0.78 | 0.7 | 0.63 | 0.56 | 0.49 | 0.42 | 0.36 | 0.3  | 0.24 | 0.18 | 0.12 | 0.05 | 0.01 | 0.01 |
|              | niche   | 1 | 0.97 | 0.86 | 0.77 | 0.7 | 0.62 | 0.54 | 0.46 | 0.38 | 0.31 | 0.24 | 0.16 | 0.09 | 0.01 | 0.01 | 0.01 | 0.01 |
|              | neutral | 1 | 0.98 | 0.86 | 0.78 | 0.7 | 0.63 | 0.56 | 0.49 | 0.42 | 0.36 | 0.3  | 0.23 | 0.18 | 0.11 | 0.05 | 0.01 | 0.01 |
| $\sigma=200$ | niche1  | 1 | 0.98 | 0.86 | 0.78 | 0.7 | 0.63 | 0.56 | 0.49 | 0.42 | 0.36 | 0.3  | 0.23 | 0.17 | 0.12 | 0.05 | 0.01 | 0.01 |
|              | nche    | 1 | 0.97 | 0.86 | 0.77 | 0.7 | 0.62 | 0.54 | 0.46 | 0.38 | 0.31 | 0.23 | 0.16 | 0.09 | 0.01 | 0.01 | 0.01 | 0.01 |

288 APPENDIX E: ANALYSIS OF RESULTS IN THE ATTRIBUTE-BASED  
289 CONTINUUM

290 The original attribute-based neutral-niche continuum supposes that communities  
291 composed of species with a given degree of niche separation will display patterns that  
292 will fall within the range of patterns generated when species niche are completely  
293 separated on one hand, and when species niches completely overlap on the other hand  
294 [1, 2]. It considers that any process with complete niche separation corresponds to a  
295 niche process, whereas complete niche overlap corresponds to a neutral process. The  
296 continuum is then supposed to allow for assessing the relative importance of the so-  
297 called neutral and niche processes. In the main article, we criticise two aspects of this  
298 continuum. First we show that this definition of the continuum is inadequate for this  
299 task because it equates community attributes with processes (i.e. it is an attribute-  
300 based continuum). We therefore propose the community assembly phase space  
301 (CAPS), a new approach based on mechanisms to truly assess the effect of neutral and  
302 niche processes (i.e. a process-based continuum). Second, we question the continuum  
303 hypothesis, which implies that community patterns produced by a composite model  
304 including both neutral and niche processes should fall within the range of patterns  
305 produced by pure niche and pure neutral processes. We showed that the continuum  
306 hypothesis does not hold for all attribute values in the process-based CAPS.

307 Here, in addition to test the continuum hypothesis using the process-based CAPS,  
308 we use three of the four community patterns presented in the article to test if the  
309 continuum hypothesis holds for the attribute-based definition (the diversity signature  
310 is more complex to analyse and is not presented here to improve the clarity of the  
311 results, which consist of the comparison of multiple models). To do so, we compared

312 the output of the neutral and composite models for the same dispersal parameter, but  
313 varying the niche width (Figure E1). The composite model with a niche width of 1 is  
314 the closest to the complete niche segregation, i.e. the “niche model” in the attribute-  
315 based continuum, whereas the neutral model corresponds to an infinite niche width.  
316 We also compared the pure niche models for the different niche widths, which  
317 correspond to infinite dispersal. The neutral model, as it was implemented here, with  
318 infinite dispersal would correspond to a spatially random model (every empty location  
319 could be colonized by any of the 100 species with the same probability), and we did  
320 not perform simulations for the random model.

321 Although results are of course different from when testing the neutral-niche  
322 continuum in the process-based CAPS, since they do not compare the same  
323 simulation outputs, they nonetheless show that the continuum hypothesis does not  
324 hold for all the community patterns even for the attribute-based continuum. The  
325 continuum holds for the niche selection patterns, and realised niche optima are more  
326 similar to the fundamental ones as the niche width decrease. This is to be expected,  
327 since the decrease of overlap logically leads species to be able to colonise cells with  
328 their preferred environment through species-sorting. However, the attribute-based  
329 continuum is not verified for the RADs and only for dispersal  $d \geq 20$  for the SARs. As  
330 niche width decreases, from infinity, spatial aggregation increases due to the niche  
331 selection by individuals in the spatial autocorrelation of the environment. This is the  
332 same behaviour described in the discussion of the main article. The selection of  
333 similar values of the environmental variable by individuals from the same species will  
334 cause them to be located close to each other since the environment is spatially  
335 autocorrelated. This in turn will increase the propagule pressure for this species when  
336 nearby cells become available, and therefore increases to the aggregation of the

337 species. The processes of dispersal and niche selection therefore reinforce each other,  
338 also leading to more discrepancy between species relative abundance, i.e. steeper  
339 RADs (Figure E1).

340 As niche separation increases even more ( $d$  decreases), though, it prevents species  
341 aggregation from being higher than the spatial aggregation of the environment. This  
342 results in a non-monotonic relationship between the slopes of the RADs and SARs  
343 and the niche width. However, the reinforcement between the two processes leading  
344 to this non-monotonic relationship decreases or disappears as the dispersal limitation  
345 decreases ( $d$  increases), in which case the neutral model generates less aggregated  
346 species than the composite model because it tends towards spatial randomness.

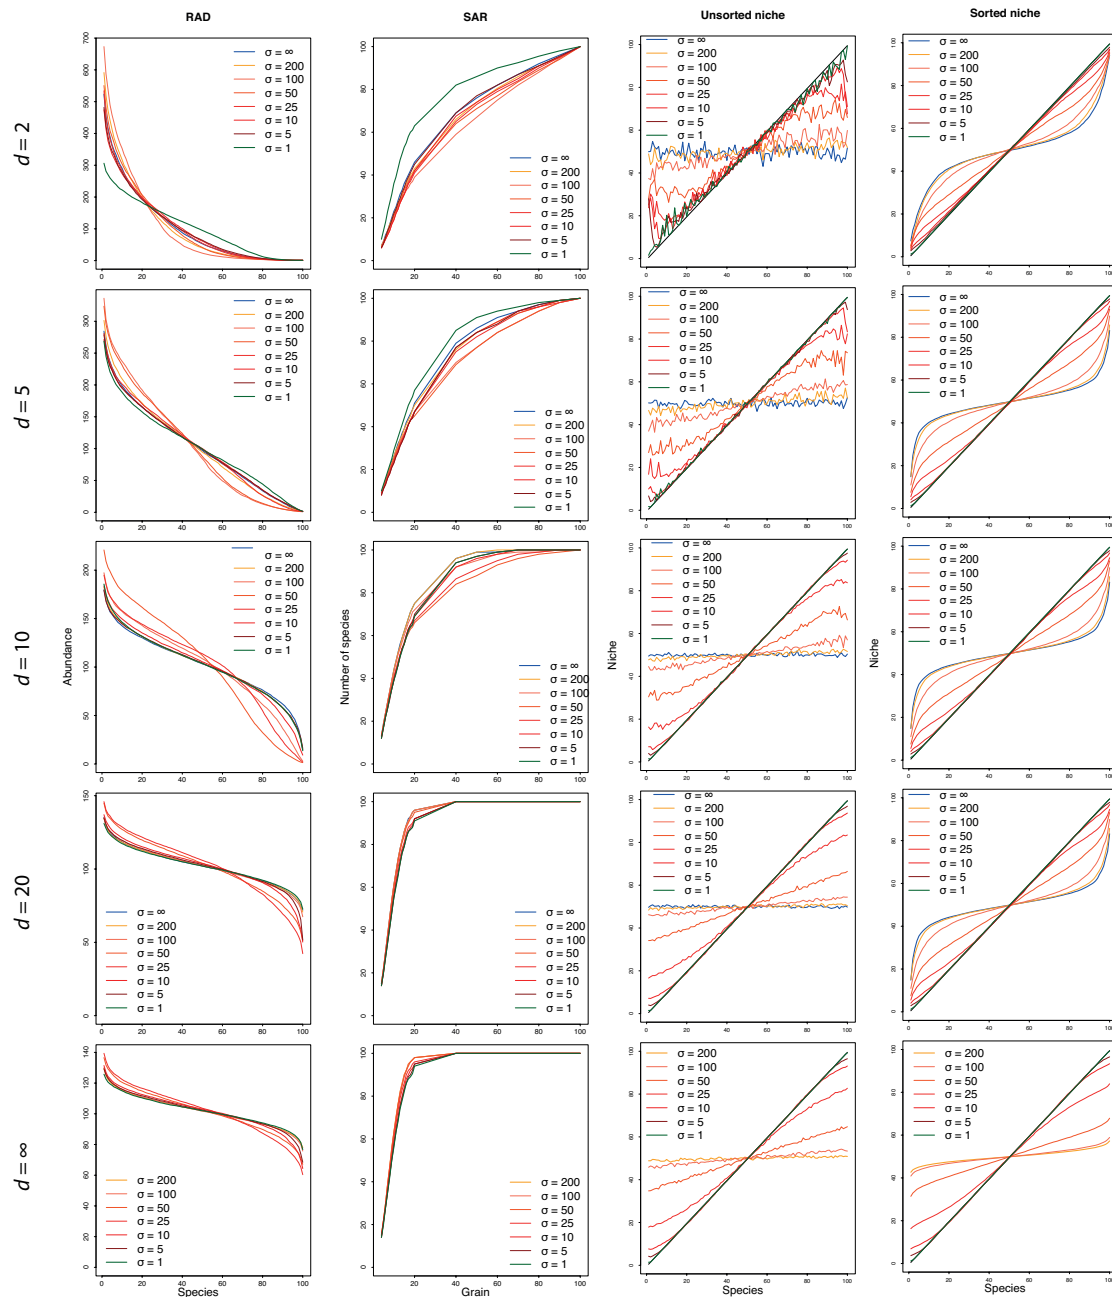

347

348 Figure E1. Results for the RAD, SAR, and niche selection patterns presented  
 349 from the attribute-based continuum conceptualisation, that is by varying the  
 350 niche width from  $\sigma = 1$  to  $\sigma = 200$ . The neutral parameter corresponds to an  
 351 infinite niche width  $\sigma = \infty$  (no niche separation). Each row corresponds to a  
 352 different value of the dispersal parameter  $d = 2, 5, 10, 20$ , which is inversely  
 353 proportional to dispersal limitation. The last row compares pure niche models,

354 hence corresponds to  $d = \infty$  (no dispersal limitation). The neutral model would  
355 then correspond to a spatially random model and was not simulated.

356

357

#### REFERENCES

358

359

1. Bar-Massada A., Kent R., Carmel Y. 2014 Environmental heterogeneity

360

affects the location of modelled communities along the niche–neutrality continuum.

361

*Proceedings of the Royal Society B: Biological Sciences* **281**(1783), 20133249.

362

(doi:10.1098/rspb.2013.3249).

363

2. Gravel D., Canham C.D., Beaudet M., Messier C. 2006 Reconciling niche and

364

neutrality: the continuum hypothesis. *Ecol. Lett.* **9**(4), 399-409. (doi:10.1111/j.1461-

365

0248.2006.00884.x).

366
